23 **Abstract**

24 Acoustic signaling by fishes has been recognized for millennia, but is typically regarded as  
25 comparatively rare within ray-finned fishes; as such, it has yet to be integrated into broader  
26 concepts of vertebrate evolution. We map the most comprehensive data set of volitional sound  
27 production of ray-finned fishes (Actinopterygii) yet assembled onto a family level phylogeny of  
28 the group, a clade representing more than half of extant vertebrate species. Our choice of family-  
29 level rather than species-level analysis allows broad investigation of sonifery within  
30 actinopterygians and provides a conservative estimate of the distribution and ancestry of a  
31 character that is likely far more widespread than currently known. The results show that families  
32 with members exhibiting soniferous behavior contain nearly two-thirds of actinopterygian  
33 species, with potentially more than 20,000 species using acoustic communication. Sonic fish  
34 families also contain more extant species than those without sounds. Evolutionary analysis  
35 shows that sound production is an ancient behavior because it is present in a clade that  
36 originating circa 340 Ma, much earlier than any evidence for sound production within tetrapods.  
37 Ancestral state reconstruction indicates that sound production is not ancestral for  
38 actinopterygians; instead, it independently evolved at least 27 times, compared to six within  
39 tetrapods. This likely represents an underestimate for actinopterygians that will change as  
40 sonifery is recognized in ever more species of actinopterygians. Several important ecological  
41 factors are significantly correlated with sonifery – including physical attributes of the  
42 environment, predation by members of other vertebrate clades, and reproductive tactics – further  
43 demonstrating the broader importance of sound production in the life history evolution of fishes.  
44 These findings offer a new perspective on the role of sound production and acoustic

45 communication during the evolution of Actinopterygii, a clade containing more than 34,000  
46 species of extant vertebrates.

47

48 **Keywords:** acoustic communication, sound production, convergent evolution, Actinopterygii,

49 key innovation

## 50 **Introduction**

51 While spoken language is regarded as a uniquely human attribute, the use of sound as a  
52 vertebrate communication channel also occurs in other terrestrial species and marine mammals  
53 (Bradbury and Vehrencamp 2011, Ladich and Winkler 2017). Less well known is its prevalence  
54 among fishes, despite multiple early descriptions of anatomy, physiology or behavior (Dufossé  
55 1874, Tower 1908), including von Frisch's comments on its widespread distribution as early as  
56 1938:

57       It may well be asked for what purpose fishes are able to hear so well in silent water. ...  
58       We know many species of sound-producing fish. There may be many more species of  
59       sound-producing fishes not yet known. ... [and] much to discover in the future about the  
60       language of fishes. (von Frisch 1938)

61 Since then, a growing body of evidence shows the importance of volitional sound production in  
62 social communication and reproduction especially among ray-finned fishes (Actinopterygii)  
63 (Ladich 2015), a group that includes more than half of extant vertebrate diversity. Together with  
64 Sarcopterygii (coelacanths, lungfishes, and tetrapods, which includes amphibians, reptiles, birds,  
65 and mammals), Actinopterygii is one of two extant radiations of bony vertebrates (Nelson et al.  
66 2016). Although there is evidence for soniferous behavior in 800-1000 species of  
67 actinopterygians (Ladich 2015, Ladich et al. 2006) and numerous studies of neural and hormonal  
68 mechanisms that are similar to those of tetrapods (Bass 2014, Zhang and Ghazanfar 2020), more  
69 widespread recognition of acoustic behavior among fishes and its integration into broader  
70 concepts of vertebrate evolution are still lacking. This is, in part, because sound production is not  
71 externally obvious in fishes, nor can those sounds be easily detected underwater without  
72 specialized technology (Mann et al. 2016).

73           A recent study on the evolution of acoustic communication focused on tetrapods,  
74 recognized the important need for a comparable study of fishes (Chen and Wiens 2020). Using  
75 evolutionary modelling, combined with the most recent comprehensive phylogeny, we show that  
76 volitional sound production is ancestral for several speciose radiations that together comprise  
77 nearly two-thirds of the 34,000 valid extant species of actinopterygians (Fricke et al. 2020). We  
78 also show that sound production has evolved at least 27 times among actinopterygians, including  
79 the basal clade that diverged in the Carboniferous Period (~340 Ma). Thus, actinopterygian  
80 sonifery is likely an ancient communication mode that originated earlier than estimates for the  
81 origin of acoustic communication in tetrapods where it is proposed to have evolved six times  
82 (Chen and Wiens 2020). Nocturnality was identified as the one ecological factor contributing to  
83 the evolution of acoustic communication among tetrapods (Chen and Wiens 2020). We show that  
84 actinopterygian families with soniferous species are correlated with multiple ecological factors,  
85 including reproductive and mating tactics, trophic levels and complexity of habitats that vary in  
86 depth, substrate composition, and salinity.

87           In aggregate, our evidence strongly supports the hypothesis that, like tetrapods, acoustic  
88 communication is an ancient but also convergently evolved innovation across actinopterygian  
89 fishes. Unlike tetrapods, we find that actinopterygian soniferous behavior is associated with a  
90 broad range of abiotic and biotic factors, which may explain its repeated and independent  
91 evolution nearly 30 times in clades that include many of the most species-rich groups. The  
92 demonstration of repeated evolution of acoustic communication in tetrapods and now in ray-  
93 finned fishes highlights the strong selection pressure favoring this signaling modality across  
94 vertebrates.

95

## 96 **Materials and Methods**

97           We operationally define acoustic signaling, or soniferous behavior (we use these terms  
98 interchangeably) as volitional sound production associated with acoustic communication rather  
99 than by-products of feeding or locomotion. Like Chen and Wiens (2020), we score the presence  
100 or absence of soniferous behavior at a family level, in this case for valid extant species of  
101 actinopterygians in 461 families represented by species in Rabosky et al. (2018) with the  
102 assumption that sonifery is conserved and characteristic at the family level (Fricke et al. 2018).  
103 We use three lines of evidence from one or more reports to demonstrate the presence of  
104 soniferous behavior in 167 of the 461 families in our analysis (Fig. S1, Tables S1, S2): 1)  
105 quantitative or pictorial documentation of acoustic recordings (107 families); 2) the presence of  
106 specialized morphology strongly predictive of sonic ability (Fine and Parmentier 2015) (26  
107 families); or 3) qualitative descriptions of sounds strongly predictive of sonic ability and  
108 behaviorally-relevant acoustic signals (Hubbs 1920, von Frisch 1938) (34 families). To be  
109 conservative, we code as 0 (silent) all families lacking such evidence.

110           Data on fish sound production were obtained from journals, technical reports, conference  
111 proceedings, theses, and books (Table S1). We mapped the presence (= 1) or absence (i.e. silent,  
112 = 0) of soniferous behavior onto Rabosky et al.'s (2018) recent phylogeny of Actinopterygii that  
113 includes species from 461 families (Fig. S1, Table S1). Species included in the phylogeny by  
114 Rabosky et al. (2018) were assigned to families using Catalog of Fishes (Fricke et al. 2018).  
115 Since Rabosky et al. (2018), new species have been described and familial designations changed  
116 (Fricke et al. 2020). We note that four families in our analyses (Abyssocottidae, Comephoridae,  
117 Cynolebiidae, Hapalogenyidae) were merged into other families, and approximately 14 new  
118 families were recognized (Fricke et al. 2020).

119 We scored the presence or absence of soniferous behavior as a binary character (Table  
120 S2). Ancestral states were calculated using stochastic character mapping with the `make.simmap`  
121 function in the *phytools* (Revell 2012) package for R, with 1,000 MCMC generations, sampling  
122 every 100 generations. Root node values and transition rates were calculated by simulation and  
123 posterior probabilities were mapped using the `densityMap` function in *phytools* (Revell 2012)  
124 (Figs 1, 2). Phylogenetic signal was calculated using the *D* statistic (Fritz and Purvis 2010) with  
125 the *caper* R package (Orme et al. 2013).

126 Ecological attributes for all 461 families were downloaded from FishBase (Froese and  
127 Pauly 2019) using *rfishbase* 3.04 R package (Boettiger et al. 2012) (see SI Appendix, Table S2  
128 for complete data). Ecological parameters predictive of soniferous behavior were determined  
129 using logistic regression with a phylogenetic generalized linear model (Ives and Garland 2010)  
130 in *phylolm* 2.6 R package (Ho and Ané 2014). Since we tested several models for each set of  
131 parameters, we used Bonferroni correction to reduce Type I error (Rice 1989). Data on species  
132 number per family are from the Eschmeyer Catalog of Fishes (Fricke et al. 2020).

133

## 134 **Results**

135 **Ancestral States.** Stochastic character mapping simulates the distribution of a character along  
136 branches of a phylogeny (Bollback 2006, Revell 2012) and summaries of many simulations (N =  
137 1000 in this study) are used to compute probabilities of a character being ancestral at nodes.  
138 Figure 1 reconstructs ancestral states of soniferous behavior across actinopterygian phylogeny,  
139 showing the probabilities of soniferous behavior being ancestral, ranging from 0% (silent) to  
140 100% (soniferous); Table 1 presents probability values at key nodes.

141           Although sonifery occurs in the three extant clades of non-teleostean actinopterygians  
142 (Polypteriformes, Acipenseriformes, and Holostei) (Fig. 1), this reconstruction reveals that  
143 soniferous behavior is unlikely ancestral for Actinopterygii (29.4% probability). Teleostei, which  
144 comprises > 99.8% of actinopterygian species, also has low support (15.2% probability) that  
145 soniferous behavior is the ancestral state. Likewise, Osteoglossomorpha, an early diverging clade  
146 of teleosts, contains several soniferous families, but only a 25.5% probability that soniferous  
147 behavior is ancestral. Otocephala, a speciose subclade of actinopterygians exhibiting  
148 morphological adaptations to enhance hearing (Braun and Grande 2008), has an even lower  
149 probability that soniferous behavior is ancestral, 9.6%. Ostariophysii, a large subgroup of  
150 otocephalans well known for the Weberian apparatus (chain of bony elements that enhance  
151 hearing), has the lowest value among the groups analyzed that soniferous behavior is ancestral,  
152 8.5%. A second large subclade of Teleostei, Euteleostei, includes two-thirds of living fish  
153 species, but here, too, there is little support that soniferous behavior is ancestral, 9.6%.

154           We find much stronger support for soniferous behavior as a character at the base of some  
155 key nodes. Siluroidei, a subclade of catfishes, and Curimatoidea, a subclade of characins, have  
156 96.7% and 67% probabilities, respectively, that soniferous behavior is ancestral (Figs. 1, 2a.  
157 Acanthomorpha, which includes 85% of fish species in marine habitats (Wainwright and Longo  
158 2017), has a low probability (31.4%) sonifery is ancestral. However, two of its subclades,  
159 Eupercaria (e.g., “surgeonfish”, “drums”, “grunts”, scorpaenoids) and Anabantaria + Carangaria  
160 + Ovalentaria (e.g., gouramis [Osphronemidae], jacks [Carangidae], cichlids [Cichlidae]) have  
161 88.6% and 64.1% probabilities, respectively (Fig. 2b, c). An even higher probability value,  
162 97.5%, supports soniferous behavior as ancestral for a crown group within Eupercaria,  
163 Hexagrammidae (greenlings) + Zoarcoidei (e.g., wolffishes) + Cottoidei (e.g., sculpin) (Fig. 2b).



164           In aggregate, our results indicate that acoustic signaling, or soniferous behavior, has a  
165 high probability (>75%) of being ancestral for at least 27 nodes across Actinopterygii (Fig. S2).  
166 We interpret this as evidence of widespread, independent evolution of volitional sound  
167 production.

168  
169 **Phylogenetic signal.** Patterns of ancestral states alone do not predict evolutionary processes  
170 underlying character evolution, making it necessary to evaluate phylogenetic signal (Blomberg et  
171 al. 2003). We use the  $D$  statistic for binary characters (Chen and Wiens 2020, Fritz and Purvis  
172 2010), in this case soniferous or silent, to calculate phylogenetic signal. For each clade, we  
173 computed  $D$  and the probability that character evolution results from Brownian phylogenetic  
174 structure, which can be visualized by the proximity of the clade's observed  $D$ -value to the center  
175 of the distribution of simulated  $D$ -values assuming Brownian evolutionary processes (Fig. S3).  
176 Where  $D$  is > 0.0, the evolution of soniferous behavior is phylogenetically random and not  
177 conserved within a group. Where  $D$  is close to or < 0.0, evolution of soniferous behavior results  
178 primarily from Brownian evolutionary processes and phylogenetic structure, and is conserved  
179 within a group.

180           Actinopterygii and Teleostei have  $D$  values of 0.404 and 0.368, respectively (see Table 1  
181 for all  $D$  values). The next set of large clades, Otocephala, Ostariophysi and Euteleostei, have  $D$   
182 values of 0.328, 0.208, and 0.200, respectively. These values indicate that soniferous behavior is  
183 not conserved within these groups, in agreement with the relatively low to intermediate  
184 probabilities that it is ancestral for these groups (8.5% - 29.4%; Table 1). For Siluroidei, a large  
185 subclade of Otocephala,  $D$  is -0.469, consistent with the high probability that this character is  
186 ancestral for Otocephala (96.7%, Table 1).

187           Acanthomorpha has  $D = 0.270$ , in agreement with the relatively low probability that  
188   sonifery is ancestral for this group (Table 1). However, within Acanthomorpha, several nested  
189   groups show negative  $D$  values or values very close to 0.0, in agreement with the high  
190   probabilities that soniferous behavior is ancestral for these groups (Table 1). This includes two  
191   large acanthomorph clades, Eupercaria and Anabantaria + Carangaria + Ovalentaria, with  $D$   
192   values of -0.066 and 0.075, respectively. Within Eupercaria, Hexagrammidae + Zoarcoidei +  
193   Cottoidei,  $D = -0.676$ . The two smallest subclades studied, Osteoglossomorpha and  
194   Curimatoidea, have  $D$  values of 1.680 and -31.388, respectively, that agree with low  
195   (Osteoglossomorpha) and high (Curimatoidea) probabilities sonifery is ancestral for these groups  
196   (Table 1).

197

198   **Hearing specializations.** Novel auditory morphologies, generally referred to as hearing  
199   specializations, e.g., the Weberian apparatus or swim bladder extensions contacting the otic  
200   capsule, may have evolved 20 times within Teleostei (Braun and Grande 2008). Families with  
201   these adaptations (Braun and Grande 2008, Colley et al. 2019, Radford et al. 2013) (Table S2),  
202   62 of 119, are highly correlated with soniferous behavior (phylogenetic logistic regression;  $P =$   
203   0.004).

204

205   **Habitat Complexity.** Actinopterygian families with soniferous taxa live in habitats that vary in  
206   complexity depending on one or more of the following: water salinity, depth and substrate  
207   composition (Boettiger et al. 2012, Froese and Pauly 2019) (Table S2). Freshwater and brackish  
208   water are more likely than marine habitats to have families with soniferous taxa ( $P < 0.000$ ,  $<$   
209   0.000,  $> 0.05$ , respectively; values here and below based on logistic regression with a

210 phylogenetic generalized linear model(Ives and Garland 2010) after Bonferroni correction).  
211 Marine families in shallow intertidal (< 5 m depth) and neritic (< 200 m depth) zones are more  
212 likely to have soniferous taxa ( $P < 0.000$ ) than families with oceanic (i.e. marine pelagic) fishes  
213 ( $P > 0.05$ ). Within families with freshwater species, there is no significant correlation of  
214 soniferous behavior with depth (littoral zone, sublittoral zone, caves;  $P$  values  $> 0.05$ ). Habitats  
215 with coarse ( $P = 0.008$ ), but not fine ( $P > 0.05$ ), sediment are also more likely to have families  
216 with soniferous taxa. Soniferous families are not more likely to live in any one particular climate  
217 (polar, temperate, boreal, tropical, subtropical;  $P$  values  $> 0.05$ ).

218 Grosberg et al. (2012) consider the complexity of freshwater and marine environments,  
219 and how more structurally complex habitats are associated with higher biodiversity. Of the 27  
220 independent evolutionary events of soniferous behavior we describe (Fig. S2, Table S3), 18  
221 clades are primarily freshwater, and nine are either marine, anadromous, or mixed. With the  
222 exception of Myctophidae, 26 of the 27 clades live in shallow waters or demersal/benthic  
223 habitats.

224

225 **Feeding and Reproductive Ecologies.** Actinopterygian families exhibiting acoustic signaling  
226 are associated with several other behavioral phenotypes (Table S2). Marine families with grazing  
227 species are more likely to contain soniferous taxa ( $P = 0.011$ ), as are families with mating tactics  
228 and reproductive modes ranging from batch spawning ( $P < 0.0001$ ) and internal fertilization ( $P =$   
229  $0.005$ ), to nest guarding ( $P = 0.001$ ), parental care ( $P = 0.004$ ) and alternative reproductive  
230 tactics (17 of 23 families identified by Mank and Avise (2006);  $P < 0.0001$ ). Families showing  
231 sex reversal (protogyny, protandry, hermaphroditism) are not more likely to contain soniferous  
232 taxa ( $P > 0.05$ ). Consistent with field observations, actinopterygian families with soniferous taxa

233 are significant prey for birds (Elliott et al. 2003) and elasmobranchs (Navia et al. 2007) ( $P =$   
234 0.002, 0.001, respectively; cetaceans (McCabe et al. 2010) and pinnipeds (Lance and Jeffries  
235 2009) are known predators, but  $P$  values  $> 0.05$ ).

236

## 237 **Discussion**

238 Although actinopterygian fishes have long been known capable of volitional sound production  
239 (Popper and Casper 2011), few studies integrate their acoustic communication ability into a  
240 broad evolutionary context across bony vertebrates (Bass et al. 2015, Fine and Parmentier 2015).  
241 We show evidence for soniferous behavior in 167 families, containing nearly two-thirds of the  
242 estimated 34,000 valid extant species of actinopterygians (Figs. 1, 2; Tables S1, S2).  
243 Actinopterygians independently evolved soniferous ability at least 27 times (Fig. S2, Table S3).  
244 To our knowledge, all species studied to date that are capable of volitional sound production  
245 have been shown to use sound in a signaling context to either conspecific or heterospecific  
246 individuals (Ladich 2015, Ladich et al. 2006). Consequently, sound production is likely an  
247 important communication modality in most actinopterygian species. This includes two species of  
248 polypterids (Ladich and Tadler 1988), members of a family that diverged from the  
249 actinopterygian stem circa 340 Ma during the Carboniferous Period (Giles et al. 2017). This  
250 suggests that acoustic communication in actinopterygians may have similarly ancient origins,  
251 predating its emergence within tetrapods, which occurred circa 100-200 Ma (Chen and Wiens  
252 2020). We further show significant correlations between families with soniferous species and  
253 diverse freshwater and marine habitats, predation by birds and elasmobranchs, and many  
254 reproductive and mating tactics. In parallel with recent findings for tetrapods (Chen and Wiens

255 2020), our results indicate strong selection to exploit acoustic signaling for communication and  
256 ecological success across vertebrate evolution.

257

258 **Pattern and process.** Within Actinopterygii, soniferous behavior occurs across the most speciose  
259 clades and has evolved independently at least 27 times, compared to only six within tetrapods  
260 (Chen and Wiens 2020). This high frequency of convergent evolution suggests that “the interplay  
261 of historical contingency and natural selection” (Blount et al. 2018) has a prominent role in the  
262 evolution of vertebrate acoustic communication behavior. A comparable degree of convergent  
263 evolution among actinopterygians is reported for alternative reproductive tactics (Mank and  
264 Avise 2006), suggesting that extensive convergence may be an evolutionary attribute of  
265 behavioral and reproductive ecology as well as other characters in actinopterygians (e.g., venom  
266 (Smith and Wheeler 2006), restricted gill openings (Farina et al. 2015), vertebrae (Ward and  
267 Brainerd 2007), adipose fins (Stewart et al. 2014), migratory behavior (Burns and Bloom 2020),  
268 bioluminescence (Davis et al. 2014)).

269 The presence and absence of soniferous behavior among actinopterygians likely includes  
270 secondary loss, suggested elsewhere to drive speciation (Miles and Fuxjager 2019). Within  
271 speciose clades where sonifery has a high probability of being ancestral (Siluroidei, Eupercaria,  
272 Anabantaria + Carangaria + Ovalentaria, Hexagrammidae + Zoarcoidei + Cottoidei), non-  
273 soniferous clades may have secondarily lost this character. Hexagrammidae + Zoarcoidei +  
274 Cottoidei have 97.9% probability that sound production is ancestral, and a very low  $D$  value (-  
275 0.676, Table 1, Fig. 2b). Within this group, Cottoidei comprises an estimated 850 species  
276 (compared to 9 hexagrammid and 405 zoarcoid species) with a very high probability that  
277 soniferous behavior is ancestral (98.8%). This correlates with a low  $D$  value (-0.330), suggesting

278 that the evolution of soniferous behavior within Cottoidei results primarily from Brownian  
279 evolutionary processes. Fish and Mowbray (1970) comment on the absence of sound production  
280 in Zoarcidae [their Zoarchidae]. If further research provides conclusive evidence for absence,  
281 then our tree (Fig. 2c) likely indicates secondary loss. Other places to investigate potential loss of  
282 soniferous capacity are between sister groups where one is coded as silent (e.g., Lophiiformes)  
283 and the other is soniferous (Tetraodontiformes; Fig. 2c). A particularly fascinating case of  
284 secondary loss concerns catfishes in the genus *Synodontis*; some species are only soniferous and  
285 others only weakly electric (Boyle et al. 2014). Weakly electric *Synodontis* have reduced sonic  
286 muscle characters, but share characters with myogenic electric organs (Kéver et al. 2020).  
287 Further demonstration of the loss of sonifery would support the hypothesis that losses can be as  
288 important in generating diversity as gains of complexity (Miles and Fuxjager 2019).

289       Together,  $D$  values show soniferous behavior is highly conserved (low  $D$ ) in some  
290 lineages, but less in others (high  $D$ ). Comparisons of ancestral state probabilities and  $D$  values  
291 show that clades with a higher probability of soniferous ability in the common ancestor also tend  
292 to have lower  $D$  values (Table 1, Fig. 3a), indicating that when it is ancestral, it has a higher  
293 probability of being conserved within a clade. This relationship becomes even clearer when  
294 plotting ancestral state probabilities against the probability that phylogenetic signal results from  
295 Brownian phylogenetic structure (Fig. 3b). It may intuitively follow that an ancestral trait is more  
296 likely to be conserved, but these two metrics are independently derived.

297       Plotting the relationship between ancestral state estimation and phylogenetic signal may  
298 indicate a broader conceptual link between pattern (ancestral states) and process (phylogenetic  
299 signal) in character evolution (Fig. 3b). Some cases deviate from this relationship. For example,  
300 it is unlikely that soniferous behavior is ancestral for Ostariophysii, yet the character is relatively

301 conserved within this clade. Exceptions indicate that the relationship is not necessitated  
302 mathematically, but instead is governed by evolutionary principles. Characters that vary  
303 enormously in phylogenetic signal throughout lineages and are characterized by repeated gains  
304 and losses, such as soniferous behavior, may be more likely to exhibit a relationship between  
305 ancestral state and phylogenetic signal.

306

307 **Ecological success.** Our results provide compelling evidence that soniferous evolution contributes  
308 to ecological success in many actinopterygian clades, as it does in tetrapods and insects (Miles et  
309 al. 2018, Wilkins et al. 2013). For example, we can now add soniferous behavior to the suite of  
310 traits considered as evolutionary drivers in Acanthomorpha, which account for 85% of fish  
311 species in marine habitats (Wainwright and Longo 2017), because many soniferous species  
312 belong to basal acanthomorph groups, e.g., Beryciformes, Ophidiiformes, and Gadiformes (Fig.  
313 1). Soniferous behavior may be a convergent evolutionary innovation contributing to ecological  
314 success in rapidly evolving and speciose subclades of actinopterygians for which sonifery is  
315 ancestral. For example, Eupercaria and Siluroidei are nested within rapidly evolving lineages in  
316 Actinopterygii (Table 1) (Alfaro et al. 2009), and it is intriguing to hypothesize that sonifery may  
317 promote diversification through sexual selection. This also appears to be the case for soniferous  
318 tetrapods, including birds and eutherian mammals (Alfaro et al. 2009, Chen and Wiens 2020).  
319 Molecular phylogenetic support for Curimatoidea, a clade recently recognized (Arcila et al.  
320 2017, Betancur-R. et al. 2019) within Characiformes (Figs 1, 2), is bolstered by our evidence that  
321 soniferous behavior is ancestral for this clade. Intriguingly, the relationship between repeated  
322 evolution of soniferous behavior in clades that live in shallow water or structurally complex or

323 fragmented habitats where diversification is more likely to occur (Grosberg et al. 2012), suggests  
324 a strong selection for acoustic communication within biodiverse communities.

325         Urlick (1975) points out at the very beginning of his classic text, Principles of Underwater  
326 Sound, that water is an excellent medium for sound transmission compared to other modalities:  
327         Of all the forms of radiation ... sound travels through the sea the best. In the turbid,  
328         saline water of the sea, both light and radio waves are attenuated to a far greater degree  
329         than is that form of mechanical energy known as sound. (Urlick 1975)

330 The relationship between physical sound transmission in an aquatic medium with acoustic  
331 communication has previously been identified as promoting this modality in underwater habitats  
332 (Grosberg et al. 2012, Wilkins et al. 2013). Our analyses show that sonifery is correlated with  
333 families living in fresh or brackish waters, marine intertidal or neritic zones, and habitats with  
334 coarse as opposed to fine sediment bottoms. Salinity, water depth and substrate composition are  
335 all physical properties of the environment that impact acoustic properties (Forrest et al. 1993,  
336 Urlick 1975). For example, transmission loss due to absorption (“conversion of acoustic energy  
337 into heat”; Urlick 1975) is greater in seawater and shallow water. Sound speed is greater in  
338 bottoms with coarse substrates, but unpredictable in shallow water because of salinity, currents  
339 and changes in temperature at the surface. To more completely understand how physical  
340 properties of the environment combine to impact acoustic communication, direct measurements  
341 are needed in a range of habitats (Bass and Clark 2003, Lugli 2015).

342         We report a correlation between families exhibiting soniferous behavior and hearing  
343 specializations that enhance sound detection. This enhances the efficacy of other physiological  
344 mechanisms for audio-vocal coupling that support acoustic communication. Actinopterygians  
345 share with tetrapods (and insects) two hallmarks of audio-vocal coupling: auditory encoding of



346 the spectral and temporal properties of conspecific and heterospecific vocalizations (Bass et al.  
347 2005, Rohmann et al. 2013), and a central vocal corollary discharge, whereby vocal pattern  
348 generator neurons inform auditory neurons about the spectral and temporal attributes of one's  
349 own vocalizations (Chagnaud and Bass 2013).

350         Perhaps the most compelling evidence that acoustic signaling behavior contributes to  
351 ecological success within Actinopterygii is the evidence we present of its association with  
352 alternative mating tactics and multiple modes of reproduction, including nest guarding, batch  
353 spawning, internal fertilization, and parental care. These findings point to many taxa of  
354 soniferous actinopterygians as providing new testing grounds for investigating the influence of  
355 sexual and ecological selection, and drift on the evolution of acoustic communication systems  
356 (Amorim et al. 2018, Bose et al. 2018, Emlen and Oring 1977, Lee and Bass 2006, Myrberg and  
357 Riggio 1985, Wilkins et al. 2013).

358

359 **Concluding Comments.** The remarkable ecological, behavioral, and morphological diversity of  
360 actinopterygian fishes provides opportunities to test evolutionary trajectories, constraints or roles  
361 of acoustic communication. Because several key functional innovations have been associated  
362 with diversification and evolutionary success in actinopterygians (e.g., acanthomorphs;  
363 Wainwright and Longo 2017), we argue that sound production and acoustic signaling may be  
364 similar key innovations in actinopterygian evolution. In a broader sense, and together with recent  
365 demonstrations of acoustic communication in tetrapods (Chen and Wiens 2020), our findings  
366 highlight the important role that acoustic communication has played in the history of vertebrates.

367

368 **References**

- 369 Alfaro, M. E., F. Santini, C. Brock, H. Alamillo, A. Dornburg, D. L. Rabosky, G. Carnevale, L.  
370 J. Harmon. 2009. Nine exceptional radiations plus high turnover explain species diversity  
371 in jawed vertebrates. *Proceedings of the National Academy of Sciences of the United*  
372 *States of America* 106:13410-13414.
- 373 Amorim, M. C. P., R. O. Vasconcelos, M. Bolgan, S. S. Pedroso, P. J. Fonseca. 2018. Acoustic  
374 communication in marine shallow waters: Testing the acoustic adaptive hypothesis in  
375 sand gobies. *Journal of Experimental Biology* 221:jeb183681.
- 376 Arcila, D., G. Ortí, R. Vari, J. W. Armbruster, M. L. J. Stiassny, K. D. Ko, M. H. Sabaj, J.  
377 Lundberg, L. J. Revell, R. Betancur-R. 2017. Genome-wide interrogation advances  
378 resolution of recalcitrant groups in the tree of life. *Nature Ecology & Evolution* 1:0020.
- 379 Bass, A. H., C. W. Clark. 2003. The physical acoustics of underwater sound communication.  
380 Pages 15-64 in *Acoustic Communication* (A. M. Simmons, R. R. Fay, and A. N. Popper,  
381 eds.). Springer, New York.
- 382 Bass, A. H., G. J. Rose, M. B. Pritz. 2005. Auditory midbrain of fish, amphibians, and reptiles:  
383 model systems for understanding auditory function. Pages 459-492 in *The Inferior*  
384 *Colliculus* (J. A. Winer, and C. E. Schreiner, eds.). Springer, New York.
- 385 Bass, A. H. 2014. Central pattern generator for vocalization: is there a vertebrate morphotype?  
386 *Current Opinion in Neurobiology* 28:94-100.
- 387 Bass, A. H., B. P. Chagnaud, N. Y. Feng. 2015. Comparative neurobiology of sound production  
388 in fishes. Pages 35-75 in *Sound Communication in Fishes* (F. Ladich, ed.). Springer  
389 Vienna, Vienna.
- 390 Betancur-R., R., D. Arcila, R. P. Vari, L. C. Hughes, C. Oliveira, M. H. Sabaj, G. Ortí. 2019.  
391 Phylogenomic incongruence, hypothesis testing, and taxonomic sampling: The  
392 monophyly of characiform fishes. *Evolution* 73:329-345.
- 393 Blomberg, S. P., T. Garland, A. R. Ives. 2003. Testing for phylogenetic signal in comparative  
394 data: Behavioral traits are more labile. *Evolution* 57:717-745.
- 395 Blount, Z. D., R. E. Lenski, J. B. Losos. 2018. Contingency and determinism in evolution:  
396 Replaying life's tape. *Science* 362:eaam5979.
- 397 Boettiger, C., D. T. Lang, P. C. Wainwright. 2012. rfishbase: exploring, manipulating and  
398 visualizing FishBase data from R. *Journal of Fish Biology* 81:2030-2039.
- 399 Bollback, J. P. 2006. SIMMAP: Stochastic character mapping of discrete traits on phylogenies.  
400 *BMC Bioinformatics* 7:88.
- 401 Bose, A. P. H., K. M. Cogliati, N. Luymes, A. H. Bass, M. A. Marchaterre, J. A. Sisneros, B. M.  
402 Bolker, S. Balshine. 2018. Phenotypic traits and resource quality as factors affecting male  
403 reproductive success in a toadfish. *Behavioral Ecology* 29:496-507.

- 404 Boyle, K. S., O. Colleye, E. Parmentier. 2014. Sound production to electric discharge: Sonic  
405 muscle evolution in progress in *Synodontis* spp. catfishes (Mochokidae). *Proceedings of*  
406 *the Royal Society B: Biological Sciences* 281:20141197.
- 407 Bradbury, J. W., S. L. Vehrencamp. 2011. *Principles of Animal Communication, 2nd edition.*  
408 Sinauer Associates, Sunderland, MA.
- 409 Braun, C. B., T. Grande. 2008. Evolution of peripheral mechanisms for the enhancement of  
410 sound reception. Pages 99-144 in *Fish Bioacoustics* (J. F. Webb, R. R. Fay, and A. N.  
411 Popper, eds.). Springer, New York.
- 412 Burns, M. D., D. D. Bloom. 2020. Migratory lineages rapidly evolve larger body sizes than non-  
413 migratory relatives in ray-finned fishes. *Proceedings of the Royal Society B-Biological*  
414 *Sciences* 287:20192615.
- 415 Chagnaud, B. P., A. H. Bass. 2013. Vocal corollary discharge communicates call duration to  
416 vertebrate auditory system. *Journal of Neuroscience* 33:18775-18780.
- 417 Chen, Z., J. J. Wiens. 2020. The origins of acoustic communication in vertebrates. *Nature*  
418 *Communications* 11:369.
- 419 Colleye, O., B. J. Vetter, R. A. Mohr, L. H. Seeley, J. A. Sisneros. 2019. Sexually dimorphic  
420 swim bladder extensions enhance the auditory sensitivity of female plainfin midshipman  
421 fish, *Porichthys notatus*. *Journal of Experimental Biology* 222:jeb204552.
- 422 Davis, M. P., N. I. Holcroft, E. O. Wiley, J. S. Sparks, W. L. Smith. 2014. Species-specific  
423 bioluminescence facilitates speciation in the deep sea. *Marine Biology* 161:1139–1148.
- 424 Dufossé, M. 1874. Recherches sur les bruits et les sons expressifs que font entendre les poissons  
425 d'Europe et sur les organes producteurs de ces phenomenes acoustiques ainsi que sur les  
426 appareils de l'audtion de plusieurs de ces animaux. *Annales des Sciences Naturelles*  
427 *Cinquième Série: Zoologie et Paléontologie* 20:1-134.
- 428 Elliott, K. H., C. L. Struik, J. E. Elliott. 2003. Bald eagles, *Haliaeetus leucocephalus*, feeding on  
429 spawning plainfin midshipman, *Porichthys notatus*, at Crescent Beach, British Columbia.  
430 *Canadian Field-Naturalist* 117:601-604.
- 431 Emlen, S. T., L. W. Oring. 1977. Ecology, sexual selection, and the evolution of mating systems.  
432 *Science* 197:215-223.
- 433 Farina, S. C., T. J. Near, W. E. Bemis. 2015. Evolution of the branchiostegal membrane and  
434 restricted gill openings in Actinopterygian fishes. *Journal of Morphology* 276:681-694.
- 435 Fine, M. L., E. Parmentier. 2015. Mechanisms of fish sound production. Pages 77-126 in *Sound*  
436 *Communication in Fishes* (F. Ladich, ed.). Springer Vienna, Vienna.
- 437 Fish, M. P., W. H. Mowbray. 1970. *Sounds of the Western North Atlantic Fishes*. The Johns  
438 Hopkins Press, Baltimore.

- 439 Forrest, T. G., G. L. Miller, J. R. Zagar. 1993. Sound propagation in shallow water: Implications  
440 for acoustic communication by aquatic animals. *Bioacoustics* 4:259- 270.
- 441 Fricke, R., W. N. Eschmeyer, J. D. Fong. 2018. *Eschmeyer's Catalog of Fishes: Species by*  
442 *family/Subfamily*. Electronic version accessed July 2, 2018. Available at:  
443 <http://researcharchive.calacademy.org/research/ichthyology/catalog/SpeciesByFamily.asp>  
444 .
- 445 Fricke, R., W. N. Eschmeyer, J. D. Fong. 2020. *Eschmeyer's Catalog of Fishes: Species by*  
446 *family/Subfamily*. Electronic version accessed April 4, 2020. Available at:  
447 <http://researcharchive.calacademy.org/research/ichthyology/catalog/SpeciesByFamily.asp>  
448 .
- 449 Fritz, S. A., A. Purvis. 2010. Selectivity in Mammalian Extinction Risk and Threat Types: a New  
450 Measure of Phylogenetic Signal Strength in Binary Traits. *Conservation Biology*  
451 24:1042-1051.
- 452 Froese, R., D. Pauly. 2019. *FishBase*. Available at: <http://www.fishbase.org>, version 04/2019.
- 453 Giles, S., G.-H. Xu, T. J. Near, M. Friedman. 2017. Early members of 'living fossil' lineage  
454 imply later origin of modern ray-finned fishes. *Nature* 549:265-268.
- 455 Grosberg, R. K., G. J. Vermeij, P. C. Wainwrigth. 2012. Biodiversity in water and on land.  
456 *Current Biology* 22:R900-R903.
- 457 Ho, L. S. T., C. Ané. 2014. A linear-time algorithm for Gaussian and non-Gaussian trait  
458 evolution models. *Systematic Biology* 63:397-408.
- 459 Hubbs, C. L. 1920. The bionomics of *Porichthys notatus* Girard. *American Naturalist* 54:380-  
460 384.
- 461 Ives, A. R., T. Garland, Jr.,. 2010. Phylogenetic logistic regression for binary dependent  
462 variables. *Systematic Biology* 59:9-26.
- 463 Kéver, L., A. H. Bass, E. Parmentier, B. P. Chagnaud. 2020. Neuroanatomical and  
464 neurophysiological mechanisms of acoustic and weakly electric signaling in synodontid  
465 catfish *Journal of Comparative Neurology* DOI:10.1002/cne.24920.
- 466 Ladich, F., A. Tadler. 1988. Sound production in *Polypterus* (Osteichthyes: Polypteridae).  
467 *Copeia* 1988:1076-1077.
- 468 Ladich, F., S. P. Collin, P. Moller, B. G. Kapoor (eds) 2006. *Communication in Fishes*. Science  
469 Publishers, Enfield, N.H.
- 470 Ladich, F. 2015. *Sound Communication in Fishes*. Springer, Vienna.
- 471 Ladich, F., H. Winkler. 2017. Acoustic communication in terrestrial and aquatic vertebrates.  
472 *Journal of Experimental Biology* 220:2306-2317.

- 473 Lance, M. M., S. J. Jeffries. 2009. *Harbor seal diet in Hood Canal, South Puget Sound and the*  
474 *San Juan Island Archipelago. Contract Report to Pacific States Marine Fisheries*  
475 *Commission for Job Code 497; NOAA Award No. NA05NMF4391151.* Washington  
476 Department of Fish and Wildlife, Olympia, WA.
- 477 Lee, J. S. F., A. H. Bass. 2006. Dimorphic male midshipman fish: reduced sexual selection or  
478 sexual selection for reduced characters? *Behavioral Ecology* 17:670-675.
- 479 Lugli, M. 2015. Habitat acoustics and the low-frequency communication of shallow water fishes.  
480 Pages 175-206 in *Sound Communication in Fishes* (F. Ladich, ed.). Springer, Vienna.
- 481 Mank, J. E., J. C. Avise. 2006. Comparative phylogenetic analysis of male alternative  
482 reproductive tactics in ray-finned fishes. *Evolution* 60:1311-1316.
- 483 Mann, D., J. Locascio, C. Wall. 2016. Listening in the ocean: New discoveries and insights on  
484 marine life from autonomous passive acoustic recorders. Pages 309-324 in *Listening in*  
485 *the Ocean* (W. W. L. Au, and M. O. Lammers, eds.). Springer New York, New York,  
486 NY.
- 487 McCabe, E. J. B., D. P. Gannon, N. B. Barros, R. S. Wells. 2010. Prey selection by resident  
488 common bottlenose dolphins (*Tursiops truncatus*) in Sarasota Bay, Florida. *Marine*  
489 *Biology* 157:931-942.
- 490 Miles, M. C., F. Goller, M. J. Fuxjager. 2018. Physiological constraint on acrobatic courtship  
491 behavior underlies rapid sympatric speciation in bearded manakins. *Elife* 7:e40630.
- 492 Miles, M. C., M. J. Fuxjager. 2019. Phenotypic diversity arises from secondary signal loss in the  
493 elaborate visual displays of toucans and barbets. *American Naturalist* 194:152-167.
- 494 Myrberg, A. A., R. J. Riggio. 1985. Acoustically mediated individual recognition by a coral reef  
495 fish (*Pomacentrus partitus*). *Animal Behaviour* 33:411-416.
- 496 Navia, A. F., P. A. Majia-Fola, A. Giraldo. 2007. Feeding ecology of elasmobranchs in coastal  
497 waters of the Colombian Eastern Tropical Pacific. *BMC Ecology* 7:8.
- 498 Nelson, J. S., T. C. Grande, M. V. H. Wilson. 2016. *Fishes of the World, 5th Edition.* John Wiley  
499 & Sons, Inc., Hoboken, NJ.
- 500 Orme, D., R. Freckleton, G. Thomas, T. Petzoldt, S. Fritz, N. Isaac, W. Pearse. 2013. *caper:*  
501 *Comparative analyses of phylogenetics and evolution in R.* R package version 0.5.2.  
502 <https://CRAN.R-project.org/package=caper>.
- 503 Popper, A. N., B. M. Casper. 2011. Fish bioacoustics: an Introduction. Pages 236-243 in  
504 *Encyclopedia of Fish Physiology* (A. P. Farrell, ed.). Academic Press, San Diego.
- 505 Rabosky, D. L., J. Chang, P. O. Title, P. F. Cowman, L. Sallan, M. Friedman, K. Kaschner, C.  
506 Garilao, T. J. Near, M. Coll, M. E. Alfaro. 2018. An inverse latitudinal gradient in  
507 speciation rate for marine fishes. *Nature* 559:392-395.

- 508 Radford, C. A., J. C. Montgomery, P. Caiger, P. Johnston, J. Lu, D. M. Higgs. 2013. A novel  
509 hearing specialization in the New Zealand bigeye, *Pempheris adspersa*. *Biology Letters*  
510 9:4.
- 511 Revell, L. J. 2012. phytools: an R package for phylogenetic comparative biology (and other  
512 things). *Methods in Ecology and Evolution* 3:217-223.
- 513 Rice, W. R. 1989. Analyzing tables of statistical tests. *Evolution* 43:223-225.
- 514 Rohmann, K. N., D. Fergus, A. H. Bass. 2013. Plasticity in ion channel expression underlies  
515 variation in hearing during reproductive cycles. *Current Biology* 23:678-683.
- 516 Smith, W. L., W. C. Wheeler. 2006. Venom evolution widespread in fishes: a phylogenetic road  
517 map for the bioprospecting of piscine venoms. *Journal of Heredity* 97:206-217.
- 518 Stewart, T. A., W. L. Smith, M. I. Coates. 2014. The origins of adipose fins: an analysis of  
519 homoplasy and the serial homology of vertebrate appendages. *Proceedings of the Royal*  
520 *Society B: Biological Sciences* 281:20133120.
- 521 Tower, R. W. 1908. The production of sound in the drumfishes, the sea-robin and the toadfish.  
522 *Annals of the New York Academy of Sciences* 18:149-180.
- 523 Urick, R. J. 1975. *Principles of Underwater Sound, 2nd edition*. McGraw-Hill, New York.
- 524 von Frisch, K. 1938. The sense of hearing in fish. *Nature* 141:8-11.
- 525 Wainwright, P. C., S. J. Longo. 2017. Functional innovations and the conquest of the oceans by  
526 acanthomorph fishes. *Current Biology* 27:R550-R557.
- 527 Ward, A. B., E. B. Brainerd. 2007. Evolution of axial patterning in elongate fishes. *Biological*  
528 *Journal of the Linnean Society* 90:97-116.
- 529 Wilkins, M. R., N. Seddon, R. J. Safran. 2013. Evolutionary divergence in acoustic signals:  
530 causes and consequences. *Trends in Ecology & Evolution* 28:156-166.
- 531 Zhang, Y. S., A. A. Ghazanfar. 2020. A hierarchy of autonomous systems for vocal production.  
532 *Trends in Neurosciences* 43:115-126.  
533  
534

535 **Acknowledgements**

536 Research supported, in part, by National Science Foundation awards OCE-1736936 (ANR),  
537 DBI-1523836 (SCF), and IOS-1656664 (AHB), the Tontogany Creek Fund (WEB), and Cornell  
538 Lab of Ornithology (AJM). Thanks to K. Bemis, T. Grande, H. W. Greene, L. Hughes, G. Ortí,  
539 L. Page, E. Schuppe, M. Wilson and K. R. Zamudio for discussion and helpful comments on the  
540 manuscript. Thanks also to Rick Grosberg for helpful feedback on complexity of aquatic  
541 habitats.

542

543 **Author Contributions**

544 A.H.B., W.E.B., A.N.R. (listed alphabetically) conceived the study. All authors aggregated data.  
545 A.H.B., W.E.B., S.C.F., A.N.R. (listed alphabetically) analyzed the data. S.C.F. and A.N.R.  
546 conducted statistical analyses. A.N.R. wrote initial draft; A.H.B., W.E.B., S.C.F., A.N.R. (listed  
547 alphabetically) revised, and all authors approved, final version of the manuscript.

548

549 **Competing Interests**

550 None

551

552 **Materials and Correspondence**

553 Requests should be sent to A.N.R. ([arice@cornell.edu](mailto:arice@cornell.edu)) or AHB ([ahb3@cornell.edu](mailto:ahb3@cornell.edu))

554



555 **Table 1. Probabilities sound production is ancestral state, and phylogenetic signal for**  
 556 **Actinopterygii (ray-finned fishes) and some of its sub-clades.**

| Clade                                     | Number of Extant Families in Figure 2 | Estimated Number of Valid Extant Species <sup>1</sup> | Probability Soniferous Behavior is Ancestral to Clade <sup>2,3</sup> | Phylogenetic Signal |                                                             |
|-------------------------------------------|---------------------------------------|-------------------------------------------------------|----------------------------------------------------------------------|---------------------|-------------------------------------------------------------|
|                                           |                                       |                                                       |                                                                      | D statistic         | Probability of Brownian Phylogenetic Structure <sup>2</sup> |
| Actinopterygii                            | 461                                   | 34,030                                                | 29.4%                                                                | 0.404               | 0.037                                                       |
| Teleostei                                 | 456                                   | 33,970                                                | 15.2%                                                                | 0.368               | 0.057                                                       |
| Osteoglossomorpha                         | 6                                     | 250                                                   | 25.5%                                                                | 1.680               | 0.165                                                       |
| Otocephala                                | 96                                    | 11,720                                                | 9.6%                                                                 | 0.328               | 0.288                                                       |
| Ostariophysi                              | 88                                    | 11,160                                                | 8.5%                                                                 | 0.208               | 0.400                                                       |
| Curimatoidea                              | 6                                     | 420                                                   | 67.0%                                                                | -31.388             | 0.809                                                       |
| Siluroidei                                | 30                                    | 2,340                                                 | 96.7%                                                                | -0.469              | 0.609                                                       |
| Euteleostei                               | 333                                   | 20,930                                                | 9.6%                                                                 | 0.200               | 0.231                                                       |
| Acanthomorpha                             | 298                                   | 19,470                                                | 31.4%                                                                | 0.270               | 0.164                                                       |
| Eupercaria                                | 142                                   | 6,970                                                 | 88.6%                                                                | -0.066              | 0.589                                                       |
| Anabantaria +<br>Carangaria + Ovalentaria | 81                                    | 7,300                                                 | 64.1%                                                                | 0.075               | 0.489                                                       |
| Hexagrammidae +<br>Zoarcoidei + Cottoidei | 25                                    | 1,280                                                 | 97.9%                                                                | -0.676              | 0.760                                                       |
| Cottoidei                                 | 11                                    | 850                                                   | 98.8%                                                                | -0.330              | 0.644                                                       |

557 <sup>1</sup> Rounded to nearest 10 based on 04 April 2020 download of (Fricke et al. 2020).

558 <sup>2</sup> Probabilities for ancestral state and Brownian phylogenetic structure are represented differently  
 559 to help distinguish them.

560

561 <sup>3</sup> Node percentages summarize 1000 stochastic character mapping simulations.

562

563

564

565

566

567



568 **Figure Legends**

569

570 **Fig. 1. Family-level phylogenetic tree of actinopterygians depicting evolution of soniferous**

571 **behavior.** Shown here are posterior probabilities from ancestral state reconstruction using

572 stochastic character mapping. Probability is represented as a gradient, where blue indicates a

573 high probability and red a low probability of soniferous behavior, and yellow is equivocal. Tree

574 is pruned from species-level phylogeny of Rabosky et al.(Rabosky et al. 2018) to family-level

575 here.

576

577 **Fig. 2. Posterior probability soniferous behavior within major actinopterygian clades. (a)**

578 Otocephala, **(b)** Anabantaria + Carangaria + Ovalentaria, and **(c)** Eupercaria. For phylogenetic

579 trees showing the ancestral state estimation and associated evolutionary probabilities of sound

580 production being ancestral by stochastic character mapping, probability is represented as a

581 gradient where blue indicates high and red is low probability of sound production; yellow is

582 equivocal.

583

584 **Fig. 3. Phylogenetic signal versus ancestral state estimation for evolution of actinopterygian**

585 **soniferous behavior. (a)**  $D$  statistic value (Fritz and Purvis 2010) versus ancestral state estimate

586 (using stochastic character mapping) probability that soniferous behavior is ancestral for a clade.

587 **(b)** Probability of Brownian phylogenetic structure (modelled from  $D$  statistic) versus stochastic

588 character mapping probability soniferous behavior is ancestral for a clade. Values for  $D$  statistic,

589 probability of Brownian structure, and ancestral state probabilities are listed in Table 1. Only

590 clades with >25 families are used, since inference of  $D$  is limited for clades with <25 taxa (Fritz

591 and Purvis 2010).

592 **Supplementary Information**

593

594 **Fig. S1. Soniferous behavior mapped onto phylogenetic tree of actinopterygian families.**

595 Tree shows three different lines of evidence for soniferous behavior used here and its  
596 phylogenetic distribution. Tree is pruned from species-level phylogeny of Rabosky et al. (2018)  
597 to family-level here. Some clades recovered using genomic (Betancur-R et al. 2017; Near et al.  
598 2012; Rabosky et al. 2018) and transcriptomic data (Hughes et al. 2018) are supported by well-  
599 accepted, anatomical synapomorphies, but others such as Ovalentaria (Hughes et al. 2018) are  
600 not.

601

602 **Fig. S2. Count of occurrences of the evolution of sonifery.** Independent origins of soniferous  
603 behavior in actinopterygian fishes, inferred from node values calculated in Fig. 1.

604

605 **Fig. S3. Observed *D*-values for each clade.** The observed *D*-values (vertical lines) indicate the  
606 strength of phylogenetic signal, based on their value relative to the distribution of simulated *D*-  
607 values assuming Brownian evolutionary processes (histograms) for each clade. Values that fall  
608 closer to the center of the distribution indicate higher phylogenetic signal within a clade. Some  
609 observed *D*-values were closer to (although not near the center of) the simulated distribution  
610 based on models of random character evolution with respect to phylogeny (red histograms in  
611 upper right plot).

612

613

614 **Table S1.** Evidence for sound production in actinopterygian families. Levels of evidence are  
 615 coded as audio recordings (1), morphological inference (2), or qualitative observations (3).  
 616 Representative references are included to support evidence of sound production. Families are  
 617 arranged in sequence following their phylogenetic placement in Figure 1, arranged clockwise.

| Number | Higher Taxonomy   | Family           | Sonic Evidence | Representative References              |
|--------|-------------------|------------------|----------------|----------------------------------------|
| 1.     | Cladistia         | Polypteridae     | 1              | (Ladich and Tadler 1988)               |
| 2.     | Chondrostei       | Acipenseridae    | 1              | (Johnston and Phillips 2003)           |
| 3.     | Amiiformes        | Amiidae          | 3              | (Fülleborn 1894)                       |
| 4.     | Elopomorpha       | Megalopidae      | 1              | (Fish and Mowbray 1970)                |
| 5.     | Elopomorpha       | Elopidae         | 1              | (Fish and Mowbray 1970)                |
| 6.     | Elopomorpha       | Albulidae        | 1              | (Fish and Mowbray 1970)                |
| 7.     | Elopomorpha       | Anguillidae      | 1              | (Fish et al. 1952)                     |
| 8.     | Elopomorpha       | Congridae        | 3              | (Moulton 1963)                         |
| 9.     | Osteoglossomorpha | Arapaimidae      | 1              | (Olsen 2014)                           |
| 10.    | Osteoglossomorpha | Osteoglossidae   | 2              | (Sørensen 1894-1895)                   |
| 11.    | Osteoglossomorpha | Notopteridae     | 3              | (Greenwood 1963)                       |
| 12.    | Osteoglossomorpha | Mormyridae       | 1              | (Crawford et al. 1997)                 |
| 13.    | Clupeiformes      | Engraulidae      | 1              | (Kuznetsov and Kuznetsov 2012)         |
| 14.    | Clupeiformes      | Clupeidae        | 1              | (Fish et al. 1952; Wilson et al. 2004) |
| 15.    | Characiformes     | Parodontidae     | 2              | (Moreira et al. 2019)                  |
| 16.    | Characiformes     | Hemiodontidae    | 2              | (Netto-Ferreira and Moreira 2019)      |
| 17.    | Characiformes     | Serrasalmidae    | 1              | (Millot et al. 2011)                   |
| 18.    | Characiformes     | Anostomidae      | 3              | (Reynalte-Tataje et al. 2013)          |
| 19.    | Characiformes     | Prochilodontidae | 1              | (Godinho et al. 2017)                  |
| 20.    | Characiformes     | Curimatidae      | 1              | (Borie et al. 2019)                    |
| 21.    | Characiformes     | Gasteropelecidae | 3              | (Weitzman 1954)                        |
| 22.    | Characiformes     | Characidae       | 1              | (Meschkat 1957)                        |

|     |              |                   |   |                                                       |
|-----|--------------|-------------------|---|-------------------------------------------------------|
| 23. | Siluriformes | Callichthyidae    | 1 | (Kaatz and Lobel 1999)                                |
| 24. | Siluriformes | Loricariidae      | 1 | (Heyd and Pfeiffer 2000)                              |
| 25. | Siluriformes | Aspredinidae      | 1 | (Kaatz and Stewart 2012)                              |
| 26. | Siluriformes | Auchenipteridae   | 1 | (Kaatz and Stewart 2012)                              |
| 27. | Siluriformes | Doradidae         | 1 | (Ladich 2001)                                         |
| 28. | Siluriformes | Heteropneustidae  | 3 | (Kaatz et al. 2010)                                   |
| 29. | Siluriformes | Clariidae         | 3 | (Goel 1966)                                           |
| 30. | Siluriformes | Chacidae          | 3 | (Kaatz et al. 2010)                                   |
| 31. | Siluriformes | Siluridae         | 3 | (Moulton 1963)                                        |
| 32. | Siluriformes | Horabagridae      | 3 | (Kaatz et al. 2010)                                   |
| 33. | Siluriformes | Bagridae          | 1 | (Heyd and Pfeiffer 2000)                              |
| 34. | Siluriformes | Sisoridae         | 3 | (de Pinna 1996; Mahajan 1963)                         |
| 35. | Siluriformes | Plotosidae        | 3 | (Burgess 1989)                                        |
| 36. | Siluriformes | Pangasiidae       | 3 | (Marshall 1966; Sorensen 1890)                        |
| 37. | Siluriformes | Cranoglanididae   | 2 | (Diogo et al. 2002)                                   |
| 38. | Siluriformes | Ictaluridae       | 1 | (Fine et al. 1997)                                    |
| 39. | Siluriformes | Ariidae           | 1 | (Breder 1968)                                         |
| 40. | Siluriformes | Pseudopimelodidae | 1 | (Kaatz and Stewart 2012)                              |
| 41. | Siluriformes | Pimelodidae       | 1 | (Kaatz and Stewart 2012)                              |
| 42. | Siluriformes | Schilbeidae       | 2 | (Mo 1991)                                             |
| 43. | Siluriformes | Heptapteridae     | 1 | (Heyd and Pfeiffer 2000; Schachner and Schaller 1981) |
| 44. | Siluriformes | Claroteidae       | 1 | (Kaatz et al. 2010; Skelton and Skelton 1993)         |
| 45. | Siluriformes | Malapteruridae    | 2 | (Howes 1985; Sørensen 1894-1895)                      |
| 46. | Siluriformes | Mochokidae        | 1 | (Kaatz and Stewart 2012)                              |

|     |                     |                   |   |                                                        |
|-----|---------------------|-------------------|---|--------------------------------------------------------|
| 47. | Cypriniformes       | Catostomidae      | 1 | (Straight et al. 2014)                                 |
| 48. | Cypriniformes       | Cobitidae         | 1 | (Rigley and Marshall 1971)                             |
| 49. | Cypriniformes       | Balitoridae       | 3 | (Dufossé 1874)                                         |
| 50. | Cypriniformes       | Nemacheilidae     | 3 | (Dufossé 1874)                                         |
| 51. | Cypriniformes       | Cyprinidae        | 1 | (Winn and Stout 1960)                                  |
| 52. | Cypriniformes       | Gobionidae        | 1 | (Scholz and Ladich 2006)                               |
| 53. | Cypriniformes       | Leuciscidae       | 1 | (Johnston and Vives 2003; Protasov 1965)               |
| 54. | Protacanthopterygii | Salmonidae        | 1 | (Johnson et al. 2017; Neproshin 1972; Neproshin 1974)  |
| 55. | Osmeriformes        | Osmeridae         | 1 | (Neproshin et al. 1980)                                |
| 56. |                     | Myctophidae       | 1 | (McCauley and Cato 2016)                               |
| 57. | Percopsiformes      | Aphredoderidae    | 3 | (Abbott 1877)                                          |
| 58. | Zeiformes           | Zeidae            | 1 | (Onuki and Somiya 2004)                                |
| 59. | Gadiformes          | Moridae           | 1 | (Marshall 1967; Tavolga 1964)                          |
| 60. | Gadiformes          | Phycidae          | 1 | (Fish and Mowbray 1970)                                |
| 61. | Gadiformes          | Lotidae           | 1 | (Hawkins and Rasmussen 1978; Rountree and Juanes 2010) |
| 62. | Gadiformes          | Gadidae           | 1 | (Fish et al. 1952)                                     |
| 63. | Gadiformes          | Merlucciidae      | 1 | (Fish 1954)                                            |
| 64. | Gadiformes          | Macrouridae       | 2 | (Marshall 1965)                                        |
| 65. | Lampriformes        | Veliferidae       | 2 | (Walters 1960)                                         |
| 66. | Holocentriformes    | Holocentridae     | 1 | (Bright and Sartori 1972; Moulton 1958)                |
| 67. | Trachichthyiformes  | Trachichthyidae   | 2 | (Shimizu 1977)                                         |
| 68. | Trachichthyiformes  | Monocentridae     | 1 | (Onuki et al. 2010)                                    |
| 69. | Ophidiiformes       | Dinematichthyidae | 1 | (Campagna 1973; Howes 1992)                            |
| 70. | Ophidiiformes       | Bythitidae        | 1 | (Campagna 1973)                                        |

|     |                   |                |   |                                                         |
|-----|-------------------|----------------|---|---------------------------------------------------------|
| 71. | Ophidiiformes     | Carapidae      | 1 | (Parmentier et al. 2003)                                |
| 72. | Ophidiiformes     | Ophidiidae     | 1 | (Courtenay and McKittrick 1970; Parmentier et al. 2010) |
| 73. | Batrachoidiformes | Batrachoididae | 1 | (Fish et al. 1952)                                      |
| 74. | Eupercaria        | Scaridae       | 1 | (Tricas and Boyle 2014)                                 |
| 75. | Eupercaria        | Labridae       | 1 | (Fish et al. 1952)                                      |
| 76. | Eupercaria        | Glaucomatidae  | 1 | (Mok et al. 2011; Parsons et al. 2013)                  |
| 77. | Eupercaria        | Pempheridae    | 1 | (Takayama et al. 2003)                                  |
| 78. | Eupercaria        | Triodontidae   | 3 | (Breder and Clark 1947)                                 |
| 79. | Eupercaria        | Ostraciidae    | 1 | (Fish and Mowbray 1970; Lobel 1996)                     |
| 80. | Eupercaria        | Triacanthidae  | 3 | (Breder and Clark 1947; Bridge 1904)                    |
| 81. | Eupercaria        | Balistidae     | 1 | (Fish et al. 1952; Salmon et al. 1968)                  |
| 82. | Eupercaria        | Monacanthidae  | 1 | (Fish et al. 1952)                                      |
| 83. | Eupercaria        | Molidae        | 1 | (Fish and Mowbray 1970)                                 |
| 84. | Eupercaria        | Diodontidae    | 1 | (Fish et al. 1952)                                      |
| 85. | Eupercaria        | Tetraodontidae | 1 | (Fish et al. 1952)                                      |
| 86. | Eupercaria        | Priacanthidae  | 1 | (Salmon and Winn 1966)                                  |
| 87. | Eupercaria        | Caproidae      | 3 | (Bridge 1904; Fish 1948; Sørensen 1894-1895)            |
| 88. | Eupercaria        | Ephippidae     | 1 | (Fish et al. 1952)                                      |
| 89. | Eupercaria        | Zanclidae      | 1 | (Tricas and Boyle 2014)                                 |
| 90. | Eupercaria        | Acanthuridae   | 1 | (Fish and Mowbray 1970)                                 |
| 91. | Eupercaria        | Sciaenidae     | 1 | (Tower 1908)                                            |
| 92. | Eupercaria        | Lethrinidae    | 3 | (Moulton 1964)                                          |
| 93. | Eupercaria        | Sparidae       | 1 | (Fish et al. 1952)                                      |

|      |            |                  |   |                                                      |
|------|------------|------------------|---|------------------------------------------------------|
| 94.  | Eupercaria | Leiognathidae    | 3 | (Fish 1948; Uchida 1934)                             |
| 95.  | Eupercaria | Chaetodontidae   | 1 | (Tricas and Boyle 2015)                              |
| 96.  | Eupercaria | Pomacanthidae    | 1 | (Fish and Mowbray 1970; Moyer et al. 1983)           |
| 97.  | Eupercaria | Lutjanidae       | 3 | (Fish and Mowbray 1970)                              |
| 98.  | Eupercaria | Caesionidae      | 3 | (Yokoyama et al. 1994)                               |
| 99.  | Eupercaria | Haemulidae       | 1 | (Burkenroad 1930)                                    |
| 100. | Eupercaria | Moronidae        | 3 | (Fish 1954; Fish et al. 1952; Fish and Mowbray 1970) |
| 101. | Eupercaria | Sillaginidae     | 1 | (McKay 1985; Walls 1964)                             |
| 102. | Eupercaria | Gerreidae        | 3 | (Fish and Mowbray 1970)                              |
| 103. | Eupercaria | Uranoscopidae    | 3 | (Mikhailenko 1973)                                   |
| 104. | Eupercaria | Polyprionidae    | 1 | (Clark and Allen 2018)                               |
| 105. | Eupercaria | Kyphosidae       | 1 | (Fish and Mowbray 1970)                              |
| 106. | Eupercaria | Terapontidae     | 1 | (Dorai Raj 1960)                                     |
| 107. | Eupercaria | Enoplosidae      | 3 | (Graham 1992)                                        |
| 108. | Eupercaria | Latridae         | 3 | (Castelnau 1872)                                     |
| 109. | Eupercaria | Centrarchidae    | 1 | (Gerald 1971)                                        |
| 110. | Eupercaria | Neosebastidae    | 2 | (Hallacher 1974; Ishida 1994; Matsubara 1943)        |
| 111. | Eupercaria | Percidae         | 1 | (Johnston and Johnson 2000)                          |
| 112. | Eupercaria | Serranidae       | 1 | (Fish et al. 1952)                                   |
| 113. | Eupercaria | Normanichthyidae | 2 | (Yabe and Uyeno 1996)                                |
| 114. | Eupercaria | Apistidae        | 2 | (Imamura 2004)                                       |
| 115. | Eupercaria | Aploactinidae    | 1 | (Matsubara 1943; Walls 1964)                         |
| 116. | Eupercaria | Tetrarogidae     | 1 | (Walls 1964)                                         |
| 117. | Eupercaria | Synanceiidae     | 1 | (Imamura 2004; Walls 1964)                           |

|      |             |                 |   |                                             |
|------|-------------|-----------------|---|---------------------------------------------|
| 118. | Eupercaria  | Setarchidae     | 2 | (Imamura and Yabe 2002; Ishida 1994)        |
| 119. | Eupercaria  | Scorpaenidae    | 1 | (Fish and Mowbray 1970; Hallacher 1974)     |
| 120. | Eupercaria  | Sebastidae      | 1 | (Širović and Demer 2009)                    |
| 121. | Eupercaria  | Peristediidae   | 2 | (Evans 1969; Evans 1970)                    |
| 122. | Eupercaria  | Triglidae       | 1 | (Fish et al. 1952)                          |
| 123. | Eupercaria  | Anoplopomatidae | 1 | (Riera et al. 2020)                         |
| 124. | Eupercaria  | Gasterosteidae  | 2 | (Bridge 1904; Fish 1954)                    |
| 125. | Eupercaria  | Hexagrammidae   | 1 | (Yamato et al. 2018)                        |
| 126. | Eupercaria  | Anarhichadidae  | 2 | (Sørensen 1884; 1894-1895)                  |
| 127. | Eupercaria  | Cyclopteridae   | 1 | (Fish and Mowbray 1970)                     |
| 128. | Eupercaria  | Liparidae       | 2 | (Hallacher 1974)                            |
| 129. | Eupercaria  | Rhamphocottidae | 1 | (Imamura and Yabe 2002; Yabe 1985)          |
| 130. | Eupercaria  | Hemipteridae    | 2 | (Fish and Mowbray 1970)                     |
| 131. | Eupercaria  | Agonidae        | 2 | (Imamura and Yabe 2002; Yabe 1985)          |
| 132. | Eupercaria  | Cottidae        | 1 | (Barber and Mowbray 1956; Fish et al. 1952) |
| 133. | Eupercaria  | Psychrolutidae  | 2 | (Hallacher 1974; Yabe 1985)                 |
| 134. | Pelagiaria  | Pomatomidae     | 1 | (Fish and Mowbray 1970)                     |
| 135. | Pelagiaria  | Trichiuridae    | 3 | (Moulton 1963)                              |
| 136. | Pelagiaria  | Stromateidae    | 1 | (Fish et al. 1952)                          |
| 137. | Pelagiaria  | Scombridae      | 1 | (Fish and Mowbray 1970)                     |
| 138. | Sygnatharia | Dactylopteridae | 1 | (Fish and Mowbray 1970)                     |
| 139. | Sygnatharia | Mullidae        | 1 | (Fish and Mowbray 1970)                     |
| 140. | Sygnatharia | Aulostomidae    | 3 | (Bright 1972)                               |



|      |             |                  |   |                                                            |
|------|-------------|------------------|---|------------------------------------------------------------|
| 141. | Sygnatharia | Centriscidae     | 3 | (Knudsen et al. 1948)                                      |
| 142. | Sygnatharia | Syngnathidae     | 1 | (Fish 1953)                                                |
| 143. | Gobiaria    | Apogonidae       | 3 | (Kuwamura 1985)                                            |
| 144. | Gobiaria    | Odontobutidae    | 1 | (Horvatić et al. 2019)                                     |
| 145. | Gobiaria    | Gobiidae         | 1 | (Protasov et al. 1965)                                     |
| 146. | Anabantaria | Mastacembelidae  | 3 | (Sörensen 1894-1895)                                       |
| 147. | Anabantaria | Channidae        | 2 | (Sörensen 1894-1895)                                       |
| 148. | Anabantaria | Anabantidae      | 3 | (Kratochvil 1985)                                          |
| 149. | Anabantaria | Osphronemidae    | 1 | (Ladich et al. 1992)                                       |
| 150. | Carangaria  | Polynemidae      | 1 | (Fish and Mowbray 1970)                                    |
| 151. | Carangaria  | Carangidae       | 1 | (Fish et al. 1952; Moulton 1960; Taylor and Mansueti 1960) |
| 152. | Carangaria  | Centropomidae    | 1 | (Fish and Mowbray 1970)                                    |
| 153. | Carangaria  | Sphyraenidae     | 1 | (Fish and Mowbray 1970)                                    |
| 154. | Carangaria  | Scophthalmidae   | 3 | (Fish and Mowbray 1970; Lagardère et al. 2004)             |
| 155. | Carangaria  | Pleuronectidae   | 1 | (Fish et al. 1952)                                         |
| 156. | Ovalentaria | Mugilidae        | 1 | (Barros 1993)                                              |
| 157. | Ovalentaria | Pomacentridae    | 1 | (Avidor 1974; Myrberg 1972; Spanier 1979)                  |
| 158. | Ovalentaria | Blenniidae       | 1 | (Tavolga 1958)                                             |
| 159. | Ovalentaria | Polycentridae    | 3 | (Barlow 1967)                                              |
| 160. | Ovalentaria | Cichlidae        | 1 | (Myrberg et al. 1965)                                      |
| 161. | Ovalentaria | Adrianichthyidae | 1 | (Kang et al. 2017)                                         |
| 162. | Ovalentaria | Belonidae        | 3 | (Dufossé 1874)                                             |
| 163. | Ovalentaria | Scomberesocidae  | 1 | (Protasov 1965)                                            |
| 164. | Ovalentaria | Hemiramphidae    | 3 | (Burkenroad 1931)                                          |
| 165. | Ovalentaria | Cynolebiidae     | 2 | (Costa 2009; Costa et al. 2010)                            |

|      |             |                 |   |                |
|------|-------------|-----------------|---|----------------|
| 165. | Ovalentaria | Fundulidae      | 1 | (Drewry 1962)  |
| 166. | Ovalentaria | Cyprinodontidae | 1 | (Johnson 2000) |

618

619

620 **Table S2. (separate excel file) Aggregated data for 461 families considered in this analysis.**

621 Showing soniferous behaviors, valid extant species, male alternative reproductive tactics (Mank  
622 and Avise 2006), ecological data aggregated from FishBase (Boettiger et al. 2012; Froese and  
623 Pauly 2019), including occurrence of families as a function of latitude, salinity, bottom type,  
624 habitat, trophic ecology, and reproductive mode.

625 Nocturnality is strongly correlated with the evolution of acoustic communication within  
626 tetrapods (Chen and Wiens 2020). We considered including nocturnality as part of this analysis.  
627 Although there are many examples of robust nocturnal chorusing by actinopterygians (Feng and  
628 Bass 2016; Mann and Jarvis 2004; McCauley and Cato 2016; Rice et al. 2017), there are no  
629 comprehensive analyses of photoperiod-related activity patterns for the soniferous families that  
630 are the basis of our study. Assessment of nocturnality in fishes is complicated by potential  
631 sampling biases (Dornburg et al. 2017), including seasonal and diel shifts in soniferous and other  
632 behaviors coupled to peak times of spawning and reproduction (Feng and Bass 2016; Mann and  
633 Jarvis 2004; McCauley and Cato 2016; Rice et al. 2017).

634

635 **Table S3. Clades with independent evolution of sonifery in actinopterygian fishes and**  
 636 **associated habitats.** Nodes on the phylogenetic tree are labelled in Supplementary Figure 2.  
 637 Habitat data are from FishBase (Froese and Pauly 2019)

| Clade                                                                   | Marine/Freshwater                 | Habitat                                    |
|-------------------------------------------------------------------------|-----------------------------------|--------------------------------------------|
| Polypteridae                                                            | Freshwater                        | Demersal                                   |
| Acipenseridae                                                           | Anadromous                        | Demersal spawning and feeding              |
| Amiidae                                                                 | Freshwater                        | Demersal                                   |
| Megalopidae+Elopidae                                                    | Marine                            | Demersal                                   |
| Albulidae                                                               | Marine                            | Demersal                                   |
| Anguillidae                                                             | Anadromous                        | Demersal in Freshwater                     |
| Congridae                                                               | Marine                            | Demersal                                   |
| Arapaimidae+Mormyridae+<br>Gymnarchidae+Notopteridae<br>+Osteoglossidae | Freshwater                        | Rivers                                     |
| Engraulidae                                                             | Marine                            | Some demersal, some pelagic                |
| Clupeidae                                                               | Marine                            | Some demersal, some pelagic                |
| Curimatoidea                                                            | Freshwater                        | Rivers                                     |
| Gasteropelecidae                                                        | Freshwater                        | Rivers                                     |
| Characidae                                                              | Freshwater                        | Demersal                                   |
| Siluroidei                                                              | Mostly Freshwater,<br>some marine | Mostly benthic or demersal                 |
| Catostomidae                                                            | Freshwater                        | Demersal                                   |
| Cobitidae                                                               | Freshwater                        | Demersal                                   |
| Balitoridae                                                             | Freshwater                        | Demersal                                   |
| Nemacheilidae                                                           | Freshwater                        | Demersal                                   |
| Cyprinidae                                                              | Freshwater                        | Many with demersal spawning and<br>feeding |
| Gobionidae                                                              | Freshwater                        | Rivers, some demersal                      |
| Leuciscidae                                                             | Freshwater                        | Rivers                                     |
| Salmonidae                                                              | Anadromous                        | Demersal spawning                          |
| Osmeridae                                                               | Anadromous                        | Demersal and pelagic                       |
| Myctophidae                                                             | Marine                            | Bathypelagic                               |
| Aphredoderidae                                                          | Freshwater                        | Demersal spawning                          |
| Zeidae                                                                  | Marine                            | Demersal                                   |
| Gadiformes                                                              | Mostly marine                     | Demersal                                   |

638  
 639  
 640  
 641  
 642  
 643

644 **Supplementary References**

- 645 Abbott CC. 1877. Traces of a voice in Fishes. American Naturalist 11:147-156.
- 646 Avidor A. 1974. The signal jump and its associated sound in fish of the genus *Dascyllus* from the  
647 Gulf of Eilat. Master's Thesis. Tel Aviv University.
- 648 Barber SB, Mowbray WH. 1956. Mechanism of sound production in the sculpin. Science  
649 124:219-220.
- 650 Barlow GW. 1967. Social behavior of a South American leaf fish *Polycentrus schomburgkii* with  
651 an account of recurring pseudofemale behavior. American Midland Naturalist 78:215-  
652 234.
- 653 Barros NB. 1993. Feeding ecology and foraging strategies of bottlenose dolphins on the central  
654 east coast of Florida. Coral Gables, FL: University of Miami.
- 655 Betancur-R R, Wiley EO, Arratia G, Acero A, Bailly N, Miya M, Lecointre G, Ortí G. 2017.  
656 Phylogenetic classification of bony fishes. BMC Evolutionary Biology 17:162.
- 657 Boettiger C, Lang DT, Wainwright PC. 2012. rfishbase: Exploring, manipulating and visualizing  
658 FishBase data from R. Journal of Fish Biology 81:2030-2039.
- 659 Borie A, Hungria DB, Ali H, Doria CR, Fine ML, Travassos PE. 2019. Disturbance calls of five  
660 migratory Characiformes species and advertisement choruses in Amazon spawning sites.  
661 Journal of Fish Biology 95:820-832.
- 662 Breder CM, Clark E. 1947. A contribution to the visceral anatomy, development and  
663 relationships of the Plectognathi. Bulletin of the American Museum of Natural History  
664 88:287-319.
- 665 Breder CM, Jr. 1968. Seasonal and diurnal occurrences of fish sounds in a small Florida bay.  
666 Bulletin of the American Museum of Natural History 138:327-378.
- 667 Bridge TW. 1904. Fishes. Cambridge Natural History vii:pp. 139-537.
- 668 Bright CM. 1972. Bio-acoustic studies on reef organisms. In: Collette BB, Earle SA, editors.  
669 Results of the Tektite Program: Ecology of Coral Reef Fishes. Los Angeles: Natural  
670 History Museum, Los Angeles County, Science Bulletin 14. p. 45-69.
- 671 Bright TJ, Sartori JD. 1972. Sound production by the reef fishes *Holocentrus coruscus*,  
672 *Holocentrus rufus* and *Myripristis jacobus*, Family Holocentridae. Hydro-Lab Journal  
673 1:11-20.
- 674 Burgess WE. 1989. An atlas of freshwater and marine catfishes: a preliminary survey of the  
675 Siluriformes. Neptune City: T. F. H. Publications, Inc.
- 676 Burkenroad MD. 1930. Sound production in the Haemulidae. Copeia 1930:17-18.
- 677 Burkenroad MD. 1931. Notes on the sound-producing marine fishes of Louisiana. Copeia  
678 1931:20-28.
- 679 Campagna A. 1973. Comparative morphology and phylogenetic significance of sound-producing  
680 mechanisms in some Brotulidae (Osteichthyes, Ophidioidea). Doctoral Thesis. Boston  
681 University.
- 682 Castelnau FL. 1872. Contribution to the ichthyology of Australia. Proceedings of the Zoological  
683 and Acclimitation Society of Victoria 1:29-247.
- 684 Chen Z, Wiens JJ. 2020. The origins of acoustic communication in vertebrates. Nature  
685 Communications 11:369.
- 686 Clark BLF, Allen LG. 2018. Field observations on courtship and spawning behavior of the giant  
687 sea bass, *Stereolepis gigas*. Copeia 106:171-179.

- 688 Costa WJEM. 2009. Morphology of the teleost pharyngeal jaw apparatus in the Neotropical  
689 annual killifish genus *Cynolebias* (Cyprinodontiformes: Aplocheiloidei: Rivulidae).  
690 *Cybium* 33:145-150.
- 691 Costa WJEM, Ramos TPA, Alexandre LC, Ramos RTC. 2010. *Cynolebias parnaibensis*, a new  
692 seasonal killifish from the Caatinga, Parnaíba River basin, northeastern Brazil, with notes  
693 on sound producing courtship behavior (Cyprinodontiformes: Rivulidae). *Neotropical*  
694 *Ichthyology* 8:283-288.
- 695 Courtenay WR, Jr., McKittrick FA. 1970. Sound-producing mechanisms in carapid fishes, with  
696 notes on phylogenetic implications. *Marine Biology* 7:131-137.
- 697 Crawford JD, Cook AP, Herberlein AS. 1997. Bioacoustic behavior of African fishes  
698 (Mormyridae): potential cues for species and individual recognition in *Pollimyrus*. *Journal*  
699 *of the Acoustical Society of America* 102:1200-1212.
- 700 de Pinna MCC. 1996. A phylogenetic analysis of the Asian catfish families Sisoridae, Akysidae,  
701 and Amblycipitidae, with a hypothesis on the relationships of the neotropical  
702 Aspredinidae (Teleostei, Ostariophysi). *Fieldiana Zoology* 84:1-83.
- 703 Diogo R, Chardon M, Vandewalle P. 2002. Osteology and myology of the cephalic region and  
704 pectoral girdle of the Chinese catfish *Cranoglanis boudierius*, with a discussion on the  
705 autapomorphies and phylogenetic relationships of the Cranoglanididae (Teleostei :  
706 Siluriformes). *Journal of Morphology* 253:229-242.
- 707 Dorai Raj BS. 1960. On the production of underwater sound by *Therapon jarbua*. *Current*  
708 *Science* 29:277-278.
- 709 Dornburg A, Forrestel EJ, Moore JA, Iglesias TL, Jones A, Rao L, Warren DL. 2017. An  
710 assessment of sampling biases across studies of diel activity patterns in marine ray-finned  
711 fishes (Actinopterygii). *Bulletin of Marine Science* 93:611-639.
- 712 Drewry GE. 1962. Some observations of courtship behavior and sound production in five species  
713 of *Fundulus* Masters Thesis. Austin: University of Texas.
- 714 Dufossé M. 1874. Recherches sur les bruits et les sons expressifs que font entendre les poissons  
715 d'Europe et sur les organes producteurs de ces phenomenes acoustiques ainsi que sur les  
716 appareils de l'audtion de plusieurs de ces animaux. *Annales des Sciences Naturelles*  
717 *Cinquième Série: Zoologie et Paléontologie* 20:1-134.
- 718 Evans RR. 1969. Phylogenetic significance of sound producing mechanisms of Western Atlantic  
719 fishes of the family Triglidae and Peristediidae Doctoral Thesis. Ann Arbor, Michigan:  
720 Boston University Graduate School.
- 721 Evans RR. 1970. Phylogenetic significance of teleost sound producing mechanisms. *Journal of*  
722 *the Colorado-Wyoming Academy of Science* 7:9-10.
- 723 Feng NY, Bass AH. 2016. "Singing" fish rely on circadian rhythm and melatonin for the timing  
724 of nocturnal courtship vocalization. *Current Biology* 26:2681-2689.
- 725 Fine ML, Friel JP, McElroy D, King CB, Loesser KE, Newton S. 1997. Pectoral spine locking  
726 and sound production in the channel catfish, *Ictalurus punctatus*. *Copeia* 1997:777-790.
- 727 Fish MP. 1948. *Sonic fishes of the Pacific*. Woods Hole, MA: Woods Hole Oceanographic  
728 Institution.
- 729 Fish MP. 1953. The production of underwater sound by the northern seahorse, *Hippocampus*  
730 *hudsonius*. *Copeia* 1953:98-99.
- 731 Fish MP. 1954. The character and significance of sound production among fishes of the Western  
732 North Atlantic. *Bulletin of the Bingham Oceanographic Collection* 14:1-109.

- 733 Fish MP, Kelsey AS, Mowbray WH. 1952. Studies on the production of underwater sound by  
734 North Atlantic coastal fishes. *Journal of Marine Research* 11:180-193.
- 735 Fish MP, Mowbray WH. 1970. *Sounds of the Western North Atlantic Fishes*. Baltimore: The  
736 Johns Hopkins Press.
- 737 Froese R, Pauly D. 2019. FishBase. Available at: <http://www.fishbase.org>, version 04/2019.
- 738 Fülleborn F. 1894. Bericht über eine zur Untersuchung der Entwicklung von *Amia*, *Lepidosteus*  
739 und *Necturus* unternommene Reise nach Nord-America. *Sitzungsberichte Deutsche*  
740 *Akademie der Wissenschaften zu Berlin* 40:1057-1070.
- 741 Gerald JW. 1971. Sound production during courtship in six species of sunfish (Centrarchidae).  
742 *Evolution* 25:75-87.
- 743 Godinho AL, Silva CCF, Kynard B. 2017. Spawning calls by zulega, *Prochilodus argenteus*, a  
744 Brazilian riverine fish. *Environmental Biology of Fishes* 100:519-533.
- 745 Goel HC. 1966. Sound production in *Clarias batrachus* (Linnaeus). *Copeia* 1966:622-624.
- 746 Graham R. 1992. Sounds fishy. *Australia's Geographic Magazine* 14:76-83.
- 747 Greenwood PH. 1963. The swimbladder in African Notopteridae (Pisces) and its bearing on the  
748 taxonomy of the family. *Bulletin of the British Museum of Natural History: Zoology*  
749 11:377-412.
- 750 Hallacher LE. 1974. The comparative morphology of extrinsic gasbladder musculature in the  
751 scorpionfish genus *Sebastes* (Pisces: Scorpaenidae). *Proceedings of the California*  
752 *Academy of Sciences* 40:59-86.
- 753 Hawkins AD, Rasmussen KJ. 1978. The calls of gadoid fish. *Journal of the Marine Biological*  
754 *Association of the UK* 58:891-911.
- 755 Heyd A, Pfeiffer W. 2000. Über die Lauterzeugung der Welse (Siluroidei, Ostariophysi,  
756 Teleostei) und ihren Zusammenhang mit der Phylogenie und der schreckreaktion. *Revue*  
757 *Suisse de Zoologie* 107:165-211.
- 758 Horvatić S, Malavasi S, Parmentier E, Marčić Z, Buj I, Mustafić P, Čaleta M, Smederevac-Lalić  
759 M, Skorić S, Zanella D. 2019. Acoustic communication during reproduction in the basal  
760 gobioid Amur sleeper and the putative sound production mechanism. *Journal of Zoology*  
761 DOI:10.1111/jzo.12719.
- 762 Howes GJ. 1985. The phylogenetic relationships of the electric catfish family Malapteruridae  
763 (Teleostei, Siluroidei). *Journal of Natural History* 19:37-67.
- 764 Howes GJ. 1992. Notes on the anatomy and classification of ophidiiform fishes with particular  
765 reference to the abyssal genus *Acanthonus* Günther, 1878. *Bulletin of the British Museum*  
766 *of Natural History: Zoology* 58:95-131.
- 767 Hughes LC, Ortí G, Huang Y, Sun Y, Baldwin CC, Thompson AW, Arcila D, Betancur-R. R, Li  
768 C, Becker L, Bellora N, Zhao X, Li X, Wang M, Fang C, Xie B, Zhou Z, Huang H, Chen  
769 S, Venkatesh B, Shi Q. 2018. Comprehensive phylogeny of ray-finned fishes  
770 (Actinopterygii) based on transcriptomic and genomic data. *Proceedings of the National*  
771 *Academy of Sciences of the United States of America*.
- 772 Imamura H. 2004. Phylogenetic relationships and new classification of the superfamily  
773 Scorpaenoidea (Actinopterygii: Perciformes). *Species Diversity* 9:1-36.
- 774 Imamura H, Yabe M. 2002. Demise of the scorpaeniformes (Actinopterygii: Percomorpha): An  
775 alternative phylogenetic hypothesis. *Bulletin of Fisheries Sciences Hokkaido University*  
776 53:107-128.
- 777 Ishida M. 1994. Phylogeny of the suborder Scorpaenoidei (Pisces: Scorpaeniformes). *Bulletin of*  
778 *Nansei National Fisheries Research Institute* 27:1-112.



- 779 Johnson DL. 2000. Sound Production in *Cyprinodon bifasciatus* (Cyprinodontiformes).  
780 Environmental Biology of Fishes 59:341-346.
- 781 Johnson NS, Higgs D, Binder TR, Marsden JE, Buchinger T, Brege L, Bruning T, Farha S,  
782 Krueger CC. 2017. Evidence of sound production by spawning lake trout (*Salvelinus*  
783 *namaycush*) in lakes Huron and Champlain. Canadian Journal of Fisheries and Aquatic  
784 Sciences 75:429-438.
- 785 Johnston CE, Johnson DL. 2000. Sound production during the spawning season in cavity-nesting  
786 darters of the subgenus *Catonotus* (Percidae : Etheostoma). Copeia 2000:475-481.
- 787 Johnston CE, Phillips CT. 2003. Sound production in sturgeon *Scaphirhynchus albus* and *S.*  
788 *platyrhynchus* (Acipenseridae). Environmental Biology of Fishes 69:59-64.
- 789 Johnston CE, Vives SP. 2003. Sound production in *Codoma ornata* (Girard) (Cyprinidae).  
790 Environmental Biology of Fishes 68:81-85.
- 791 Kaatz IM, Lobel PS. 1999. Acoustic behavior and reproduction in five species of *Corydoras*  
792 catfishes (Callichthyidae). Biological Bulletin 197:242-242.
- 793 Kaatz IM, Stewart DJ. 2012. Bioacoustic variation of swimbladder disturbance sounds in  
794 Neotropical doradoid catfishes (Siluriformes: Doradidae, Auchenipteridae): potential  
795 morphological correlates. Current Zoology 58:171-188.
- 796 Kaatz IM, Stewart DJ, Rice AN, Lobel PS. 2010. Differences in pectoral fin spine morphology  
797 between vocal and silent clades of catfishes (Order Siluriformes): ecomorphological  
798 implications. Current Zoology 56:73-89.
- 799 Kang IJ, Qiu X, Moroishi J, Oshima Y. 2017. Sound production in Japanese medaka (*Oryzias*  
800 *latipes*) and its alteration by exposure to aldicarb and copper sulfate. Chemosphere  
801 181:530-535.
- 802 Knudsen VO, Alford RS, Emling JW. 1948. Underwater ambient noise. Journal of Marine  
803 Research 7:410-429.
- 804 Kratochvil H. 1985. Beitrage zur Lautiologi der Anabantodei: Bau, Funktion und Entwicklung  
805 von lauterzeugenden Systemen. Zoologische Jahrbücher Abteilung für Allgemeine  
806 Zoologie und Physiologie der Tiere 89:203-255.
- 807 Kuwamura T. 1985. Social and reproductive behavior of three mouthbrooding cardinalfishes,  
808 *Apogon doederleini*, *A. niger* and *A. notatus*. Environmental Biology of Fishes 13:17-24.
- 809 Kuznetsov MY, Kuznetsov YA. 2012. Sound production in some physostomous fish species and  
810 effects of biological sounds on fish. In: Popper AN, Hawkins A, editors. Effects of Noise  
811 on Aquatic Life. New York: Springer. p. 177-180.
- 812 Ladich F. 2001. Sound-generating and -detecting motor system in catfish: design of swimbladder  
813 muscles in doradids and pimelodids. Anatomical Record 263:297-306.
- 814 Ladich F, Bischof C, Schleinzer G, Fuchs A. 1992. Intra- and interspecific differences in  
815 agonistic vocalizations in croaking Gouramis (Genus: *Trichopsis*, Anabantodei,  
816 Teleostei). Bioacoustics 4:131-141.
- 817 Ladich F, Tadler A. 1988. Sound production in *Polypterus* (Osteichthyes: Polypteridae). Copeia  
818 1988:1076-1077.
- 819 Lagardère JP, Mallekh R, Mariani A. 2004. Acoustic characteristics of two feeding modes used  
820 by brown trout (*Salmo trutta*), rainbow trout (*Oncorhynchus mykiss*) and turbot  
821 (*Scophthalmus maximus*). Aquaculture 240:607-616.
- 822 Lobel PS. 1996. Spawning sound of the trunkfish, *Ostracion meleagris* (Ostraciidae). Biological  
823 Bulletin 191:308-309.



- 824 Mahajan CL. 1963. Sound producing apparatus in an Indian catfish *Sisor rhabdophorus*  
825 Hamilton. Journal of Linnean Society 44:721-724.
- 826 Mank JE, Avise JC. 2006. Comparative phylogenetic analysis of male alternative reproductive  
827 tactics in ray-finned fishes. Evolution 60:1311-1316.
- 828 Mann DA, Jarvis SM. 2004. Potential sound production by a deep-sea fish. Journal of the  
829 Acoustical Society of America 115:2331-2333.
- 830 Marshall NB. 1965. Systematic and biological studies of the Macrourid fishes (Anacanthini-  
831 Teleostii). Deep-Sea Research 12:299-322.
- 832 Marshall NB. 1966. The Life of Fishes. Cleveland: The World Publishing Company.
- 833 Marshall NB. 1967. Sound-producing mechanisms and the biology of deep-sea fishes. In:  
834 Tavolga WN, editor. Marine Bioacoustics. Oxford: Pergamon Press. p. 123-133.
- 835 Matsubara K. 1943. Studies on the scorpaenoid fishes of Japan: anatomy, phylogeny and  
836 taxonomy. Trans Sigenkagaku Kenkyusho 1:1-170.
- 837 McCauley RD, Cato DH. 2016. Evening choruses in the Perth Canyon and their potential link  
838 with Myctophidae fishes. Journal of the Acoustical Society of America 140:2384-2398.
- 839 McKay RJ. 1985. A revision of the fishes of the family Sillaginidae. Memoirs of the Queensland  
840 Museum 22:1-74.
- 841 Meschkat A. 1957. Von den Stimmen der Fische im Amazonas. Fischwirt Zeitschrift für Seen-und  
842 Flussfischen 3:67-68.
- 843 Mikhailenko NA. 1973. Organ of sound formation and electro generation in the Black Sea  
844 stargazer *Uranoscopus scaber* (Uranoscopidae). Zoologicheskii Zhurnal 52:1353-1359.
- 845 Millot S, Vandewalle P, Parmentier E. 2011. Sound production in red-bellied piranhas  
846 (*Pygocentrus nattereri*, Kner): an acoustical, behavioral and morphofunctional study.  
847 Journal of Experimental Biology 214:3613-3618.
- 848 Mo T. 1991. Anatomy, relationships and systematics of the Bagridae (Teleostei: Siluroidei) with  
849 a hypothesis of siluroid phylogeny. Theses Zoologicae 17:1-216.
- 850 Mok H-K, Parmentier E, Chiu K-H, Tsai K-E, Chiu P-H, Fine M. 2011. An intermediate in the  
851 evolution of superfast sonic muscles. Frontiers in Zoology 8:31.
- 852 Moreira CR, Netto-Ferreira AL, Colaco MV, Nogueira LP. 2019. How parodontid fishes  
853 (Ostariophysi: Characiformes) sing with their ribs. Journal of Morphology 280:S185.
- 854 Moulton JM. 1958. The acoustical behavior of some fishes in the Bimini area. Biological  
855 Bulletin 114:357-374.
- 856 Moulton JM. 1960. The acoustical anatomy of teleost fishes. Anatomical Record 138:371-372.
- 857 Moulton JM. 1963. Acoustic behavior of fishes. In: Busnel RG, editor. Acoustic behavior of  
858 animals. Amsterdam: Elsevier. p. 655-685.
- 859 Moulton JM. 1964. Acoustic behavior of fishes. In: Busnel RG, editor. Acoustic behavior of  
860 animals. New York: Elsevier. p. 655-693.
- 861 Moyer JT, Thresher RE, Collin PL. 1983. Courtship, spawning and inferred social organization  
862 of American angelfishes (genera *Pomacanthus*, *Holacanthus* and *Centropyge*;  
863 *Pomacanthidae*). Environmental Biology of Fishes 9:25-39.
- 864 Myrberg AA, Jr. 1972. Ethology of the bicolor damselfish, *Eupomacentrus partitus* (Pisces:  
865 *Pomacentridae*): a comparison of laboratory and field behavior. Animal Behavior  
866 Monographs 5:199-283.
- 867 Myrberg AA, Jr., Kramer E, Heinecke P. 1965. Sounds produced by cichlid fishes. Science  
868 149:555-558.

- 869 Near TJ, Eytan RI, Dornburg A, Kuhn KL, Moore JA, Davis MP, Wainwright PC, Friedman M,  
870 Smith WL. 2012. Resolution of ray-finned fish phylogeny and timing of diversification.  
871 Proceedings of the National Academy of Sciences of the United States of America  
872 109:13698-13703.
- 873 Neproshin AY. 1972. Some physical characteristics of the sounds in Pacific salmon.  
874 Zoologicheskii Zhurnal 51:1025-1030.
- 875 Neproshin AY. 1974. The acoustic behavior of some far eastern salmon in the spawning period.  
876 Journal of Ichthyology 14:154-157.
- 877 Neproshin AY, Kruchinin ON, Fedoseenkov AS. 1980. The acoustical behavior of the pond  
878 smelt, *Hypomesus olidus*. Journal of Ichthyology 19:167-169.
- 879 Netto-Ferreira AL, Moreira CR. 2019. A review of the vocal species of characiformes (Teleostei:  
880 Ostariophysi). Journal of Morphology 280:S191.
- 881 Olsen JEB. 2014. Predation Avoidance Mechanisms of Juvenile Arapaima spp.: Significance of  
882 Synchronized Breathing and Sound Production. State University of New York College of  
883 Environmental Science and Forestry.
- 884 Onuki A, Somiya H. 2004. Two types of sounds and additional spinal nerve innervation to the  
885 sonic muscle in John Dory, *Zeus faber* (Zeiformes: Teleostei). Journal of the Marine  
886 Biological Association of the UK 84:843-850.
- 887 Onuki A, Takizawa T, Yamamoto N, Somiya H. 2010. Sound characteristics and sonic motor  
888 system in the pinecone fish, *Monocentris japonica* (Beryciformes: Monocentridae).  
889 Copeia 2010:531-539.
- 890 Parmentier E, Bouillac G, Dragicevic B, Dulcic J, Fine M. 2010. Call properties and morphology  
891 of the sound-producing organ in *Ophidion rochei* (Ophidiidae). Journal of Experimental  
892 Biology 213:3230-3236.
- 893 Parmentier E, Vandewalle P, Lagardère JP. 2003. Sound-producing mechanisms and recordings  
894 in Carapini species (Teleostei, Pisces). Journal of Comparative Physiology A 189:283-  
895 292.
- 896 Parsons M, McCauley R, Thomas F. 2013. The sounds of fish off Cape Naturaliste, Western  
897 Australia. Acoustics Australia 41:58-64.
- 898 Protasov VR. 1965. Bioacoustics of Fishes. Moscow: Nauka.
- 899 Protasov VR, Tzvetkov VI, Rascheperin VK. 1965. Acoustic signals emitted by *Neogobius*  
900 *melanostomus* Pallas. Zhurnal Obshchei Biologii 26:151-160.
- 901 Rabosky DL, Chang J, Title PO, Cowman PF, Sallan L, Friedman M, Kaschner K, Garilao C,  
902 Near TJ, Coll M, Alfaro ME. 2018. An inverse latitudinal gradient in speciation rate for  
903 marine fishes. Nature 559:392-395.
- 904 Reynalte-Tataje DA, Lopes CA, de Ávila-Simas S, Garcia JRE, Zaniboni-Filho E. 2013.  
905 Artificial reproduction of neotropical fish: Extrusion or natural spawning? Natural  
906 Science 5:1-6.
- 907 Rice AN, Soldevilla MS, Quinlan JA. 2017. Nocturnal patterns in fish chorusing off the coasts of  
908 Georgia and eastern Florida. Bulletin of Marine Science 93:455-474.
- 909 Riera, A., R. A. Rountree, L. Agagnier, F. Juanes. 2020. Sablefish (*Anoplopoma fimbria*) produce high  
910 frequency rasp sounds with frequency modulation. *Journal of the Acoustical Society of America*  
911 147:2295-2301.
- 912 Rigley L, Marshall JA. 1971. Sound production by the loach *Botia berdmorei* (Pisces,  
913 Cobitidae). American Zoologist 11:632.

- 914 Rountree RA, Juanes F. 2010. First attempt to use a remotely operated vehicle to observe  
915 soniferous fish behavior in the Gulf of Maine, Western Atlantic Ocean. *Current Zoology*  
916 56:90-99.
- 917 Salmon M, Winn HE. 1966. Sound production by priacanthid fishes. *Copeia* 1966:869–872.
- 918 Salmon M, Winn HE, Sorgente N. 1968. Sound production and associated behavior in  
919 triggerfishes. *Pacific Science* 22:11-20.
- 920 Schachner G, Schaller F. 1981. Schallerzeugung und Schallreaktionen beim Antennenwels  
921 (Mandim) *Rhamdia sebae sebae* Val. *Zoologische Beitrage* 27:375-392.
- 922 Scholz K, Ladich F. 2006. Sound production, hearing and possible interception under ambient  
923 noise conditions in the topmouth minnow *Pseudorasbora parva*. *Journal of Fish Biology*  
924 69:892-906.
- 925 Shimizu T. 1977. Comparative morphology of the expanded epipleural and its associated  
926 structures in four species of the Trachichthyidae. *Japanese Journal of Ichthyology*  
927 23:192-198.
- 928 Širović A, Demer DA. 2009. Sounds of captive rockfishes. *Copeia* 2009:502-509.
- 929 Skelton PH, Skelton PH. 1993. *A Complete Guide to the Freshwater Fishes of Southern Africa*.  
930 Halfway House, South Africa: Southern Book Publishers.
- 931 Sorensen W. 1890. Om Forbeninger i Svømmeblæren, Pleura og Aortas Virg og  
932 Sammensmeltning deraf med Hvirvelsøjlen særlig hos Siluroiderne, samt de saakaldte  
933 Weberske Knoglers Morphologi. *Det Kongelige Danske Videnskabernes Selskabs*  
934 *Skrifter* 6 Række: Naturvidenskabelig og Mathematisk Afdeling 6:65-152.
- 935 Sörensens W. 1884. Om Lydorganer hos Fiske: En physiologisk og comparativ-anatomisk  
936 Undersøgelse. Copenhagen: V. Thaning & Appels.
- 937 Sörensens W. 1894-1895. Are the extrinsic muscles of the air-bladder in some Siluroidae and the  
938 "elastic spring" apparatus of others subordinate to the voluntary production of sounds?  
939 What is, according to our present knowledge, the function of the weberian ossicles? A  
940 contribution to the biology of fishes. *Journal of Anatomy and Physiology* 29:109-139;  
941 205-229; 399-423; 518-552.
- 942 Spanier E. 1979. Aspects of species recognition by sound in four species of damselfishes, genus  
943 *Eupomacentrus* (Pisces: Pomacentridae). *Zeitschrift für Tierpsychologie* 51:301-316.
- 944 Straight CA, Freeman BJ, Freeman MC. 2014. Passive acoustic monitoring to detect spawning in  
945 large-bodied catostomids. *Transactions of the American Fisheries Society* 143:595-605.
- 946 Takayama M, Onuki A, Yosino T, Yoshimoto M, Ito H, Kohbara J, Somiya H. 2003. Sound  
947 characteristics and the sound producing system in silver sweeper, *Pempheris schwenkii*  
948 (Perciformes: Pempheridae). *Journal of the Marine Biological Association of the UK*  
949 83:1317-1320.
- 950 Tavalga WN. 1958. Underwater sounds produced by males of the blennioid fish, *Chasmodes*  
951 *bosquianus*. *Ecology* 39:759-760.
- 952 Tavalga WN. 1964. Sonic characteristics and mechanisms in marine fishes. In: Tavalga WN,  
953 editor. *Marine Bio-acoustics*. New York: Pergamon Press. p. 195-211.
- 954 Taylor M, Mansueti RJ. 1960. Sounds produced by very young crevalle jack, *Caranx hippos*,  
955 from the Maryland seaside. *Chesapeake Science* 1:115-116.
- 956 Tower RW. 1908. The production of sound in the drumfishes, the sea-robin and the toadfish.  
957 *Annals of the New York Academy of Sciences* 18:149-180.
- 958 Tricas TC, Boyle KS. 2014. Acoustic behaviors in Hawaiian coral reef fish communities. *Marine*  
959 *Ecology Progress Series* 511:1-16.

- 960 Tricas TC, Boyle KS. 2015. Diversity and evolution of sound production in the social behavior  
961 of *Chaetodon* butterflyfishes. *Journal of Experimental Biology* 218:1572-1584.
- 962 Uchida K. 1934. On the sound-producing fishes of Japan. *Nihon Gakujitsu Kyokai Hokoku*  
963 9:369-375.
- 964 Walls PD. 1964. The anatomy of the sound producing apparatus of some Australian teleosts  
965 Honors Thesis. Brunswick, ME: Bowdoin College.
- 966 Walters V. 1960. The swimbladder of *Velifer hypselopterus*. *Copeia* 1960:144-145.
- 967 Weitzman SH. 1954. The osteology and the relationships of the South American Characid fishes  
968 of the sub-family Gasteropelecinae. *Stanford Ichthyological Bulletin* 4:213-263.
- 969 Wilson B, Batty RS, Dill LM. 2004. Pacific and Atlantic herring produce burst pulse sounds.  
970 *Biology Letters* 271:S95-S97.
- 971 Winn HE, Stout JF. 1960. Sound production by the satinfin shiner, *Notropis analostanus*, and  
972 related fishes. *Science* 132:222-223.
- 973 Yabe M. 1985. Comparative osteology and myology of the superfamily Cottoidea (Pisces,  
974 Scorpaeniformes) and its phylogenetic classification. *Memoirs of the Faculty of Fisheries*  
975 *Hokkaido University* 32:1-130.
- 976 Yabe M, Uyeno T. 1996. Anatomical description of *Normanichthys crockeri* (Scorpaeniformes,  
977 *Incertae sedis*: Family Normanichthyidae). *Bulletin of Marine Science* 58:494-510.
- 978 Yamato K, Matsuo I, Takahashi R, Matsubara N, Yasuma H. 2018. Call localization of fat  
979 greenling *Hexagrammos otakii* using two stereo underwater recorders. *Marine*  
980 *Technology Society Journal* 52:129-138.
- 981 Yokoyama K, Kamei Y, Toda M, Hirano K, Iwatsuki Y. 1994. Reproductive behavior, eggs, and  
982 larvae of a caesionine fish, *Pterocaesio digramma*, observed in an aquarium. *Japanese*  
983 *Journal of Ichthyology* 41:261-274.
- 984
- 985
- 986



Figure 1

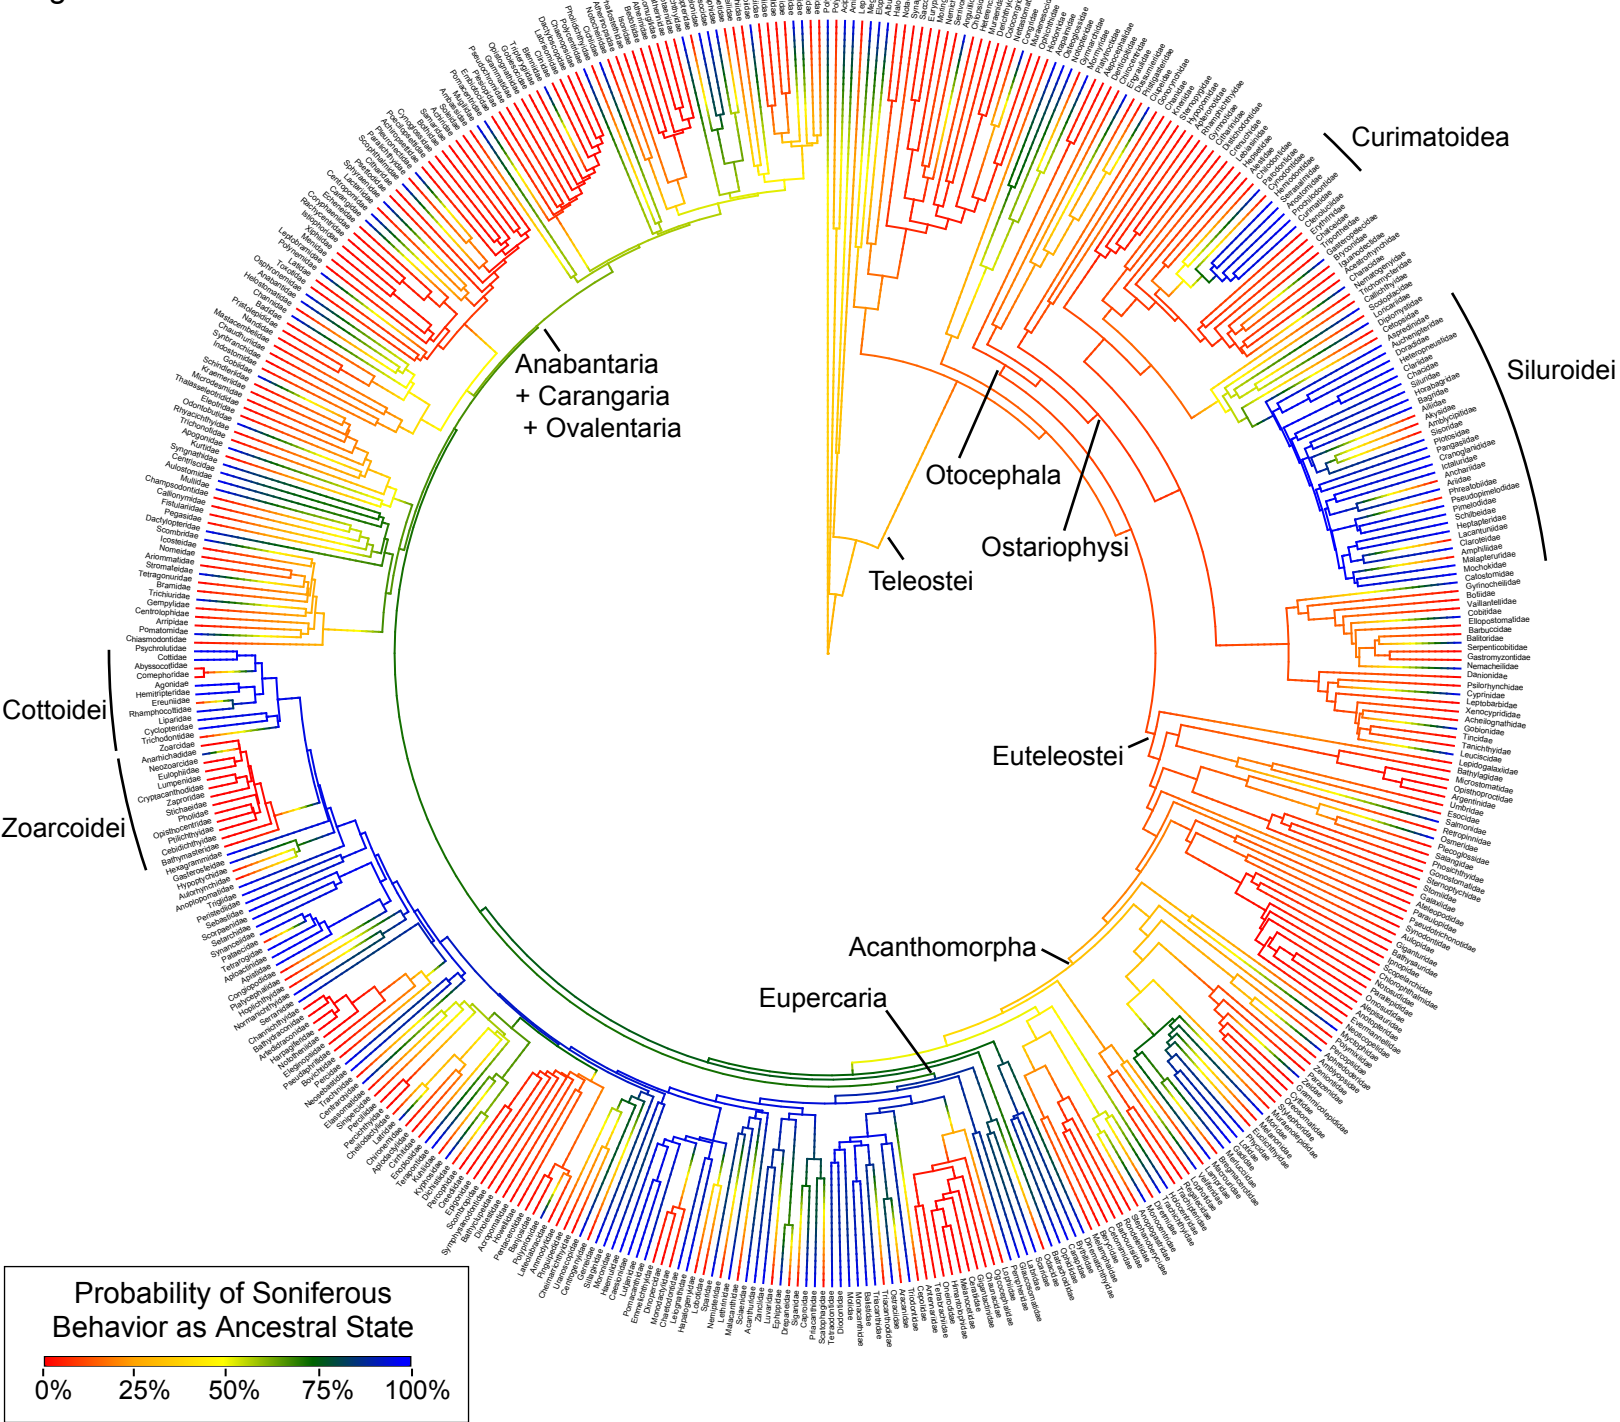

Figure 2

**a Otocephala**

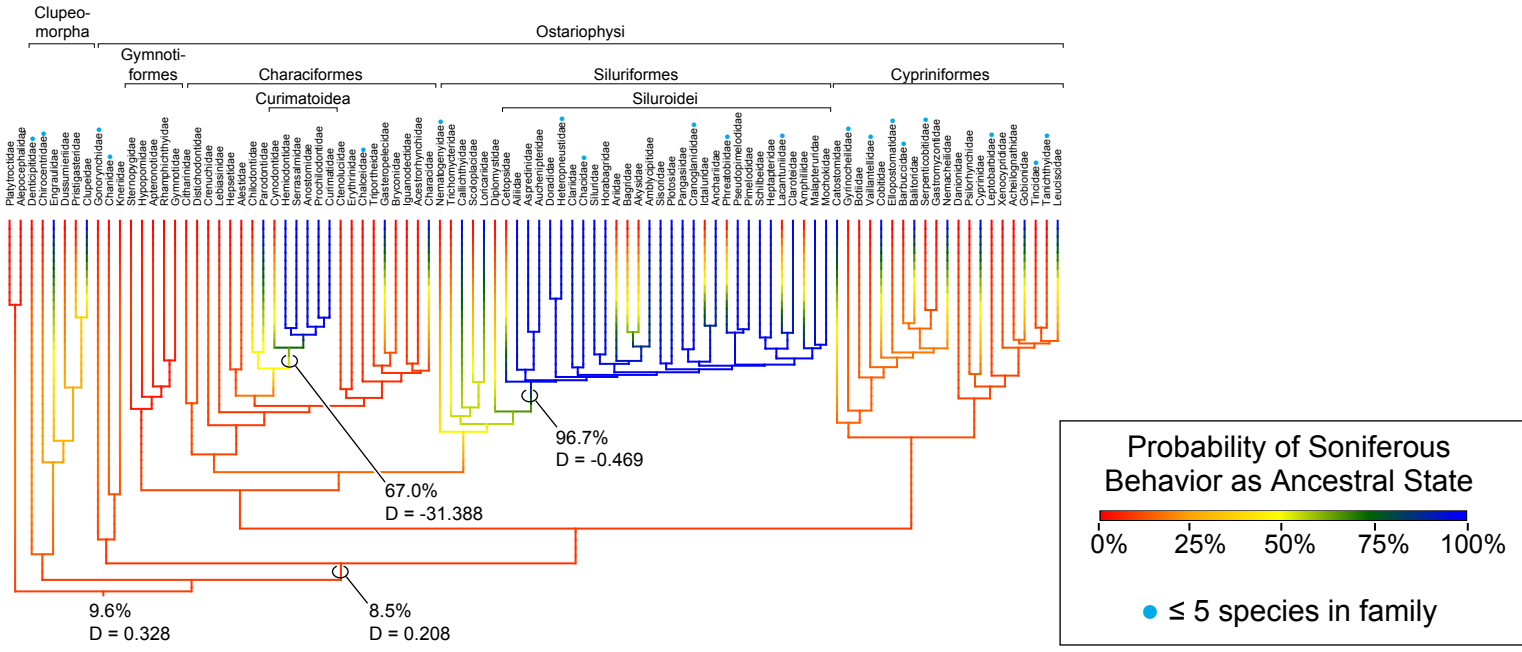

**b Eupercaria**

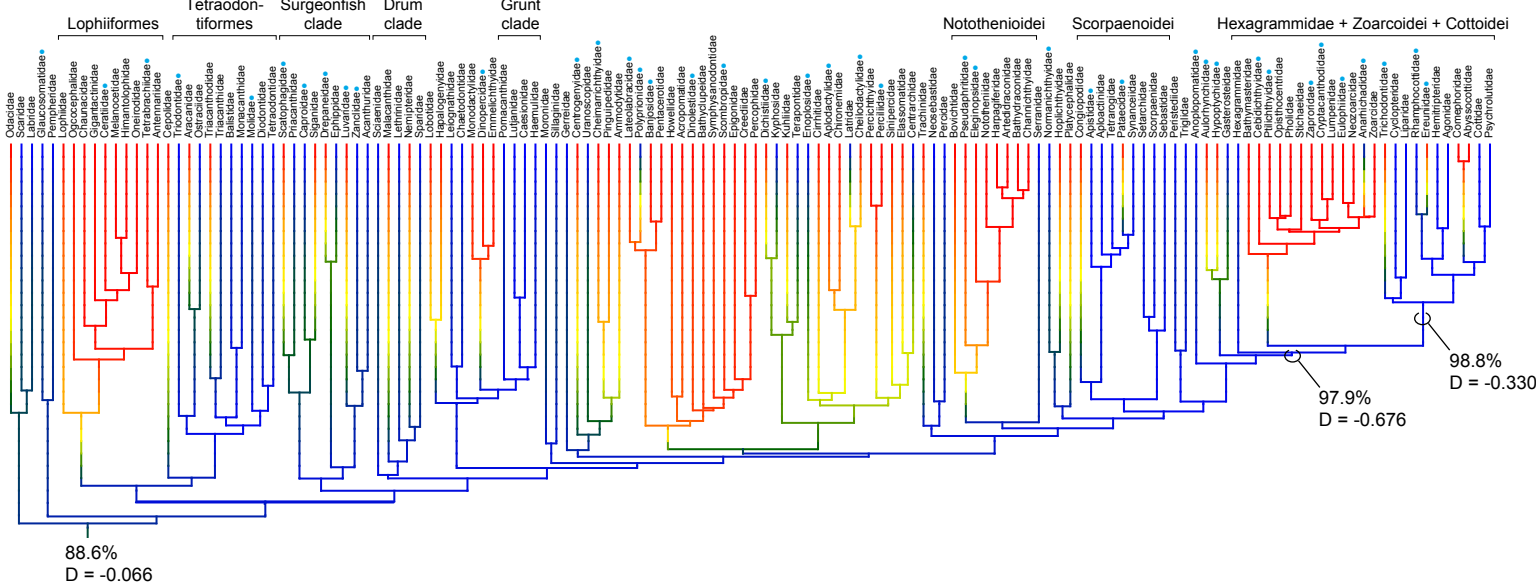

**c Anabantaria + Carangaria + Ovalentaria**

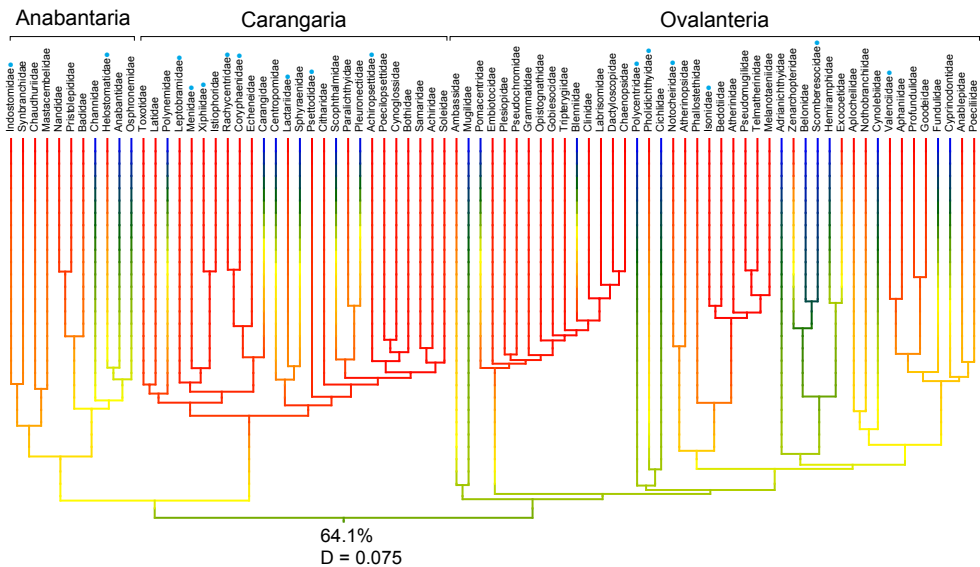

### Figure 3

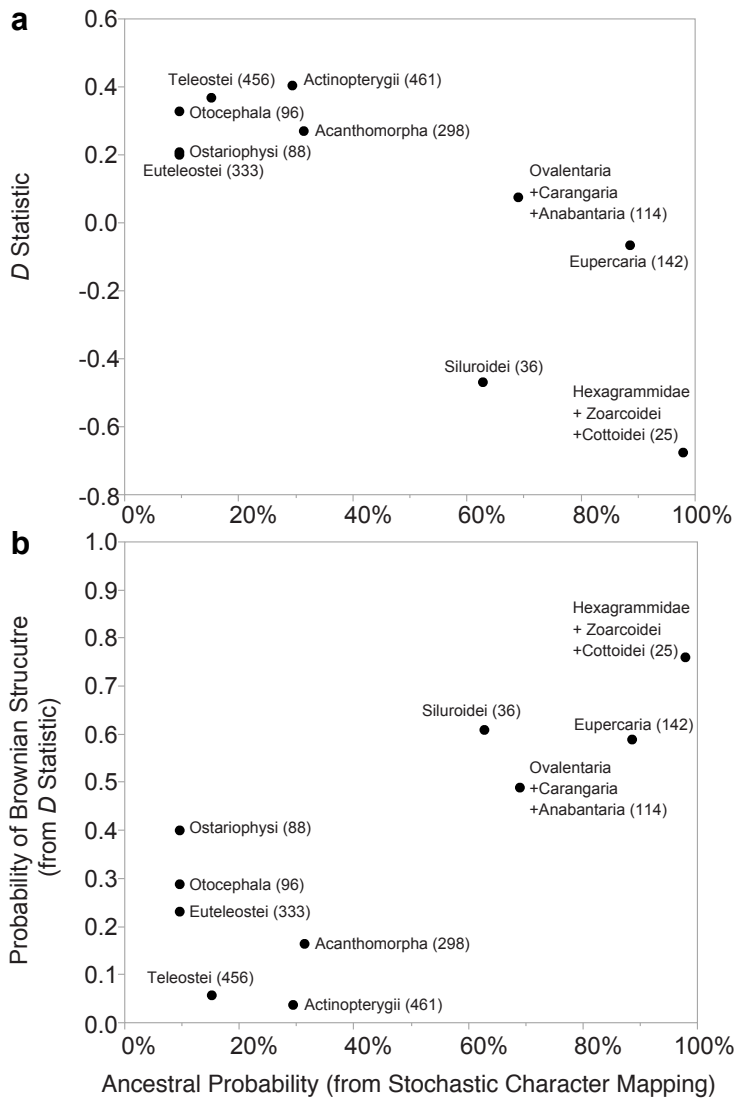

## Supplementary Figure 1

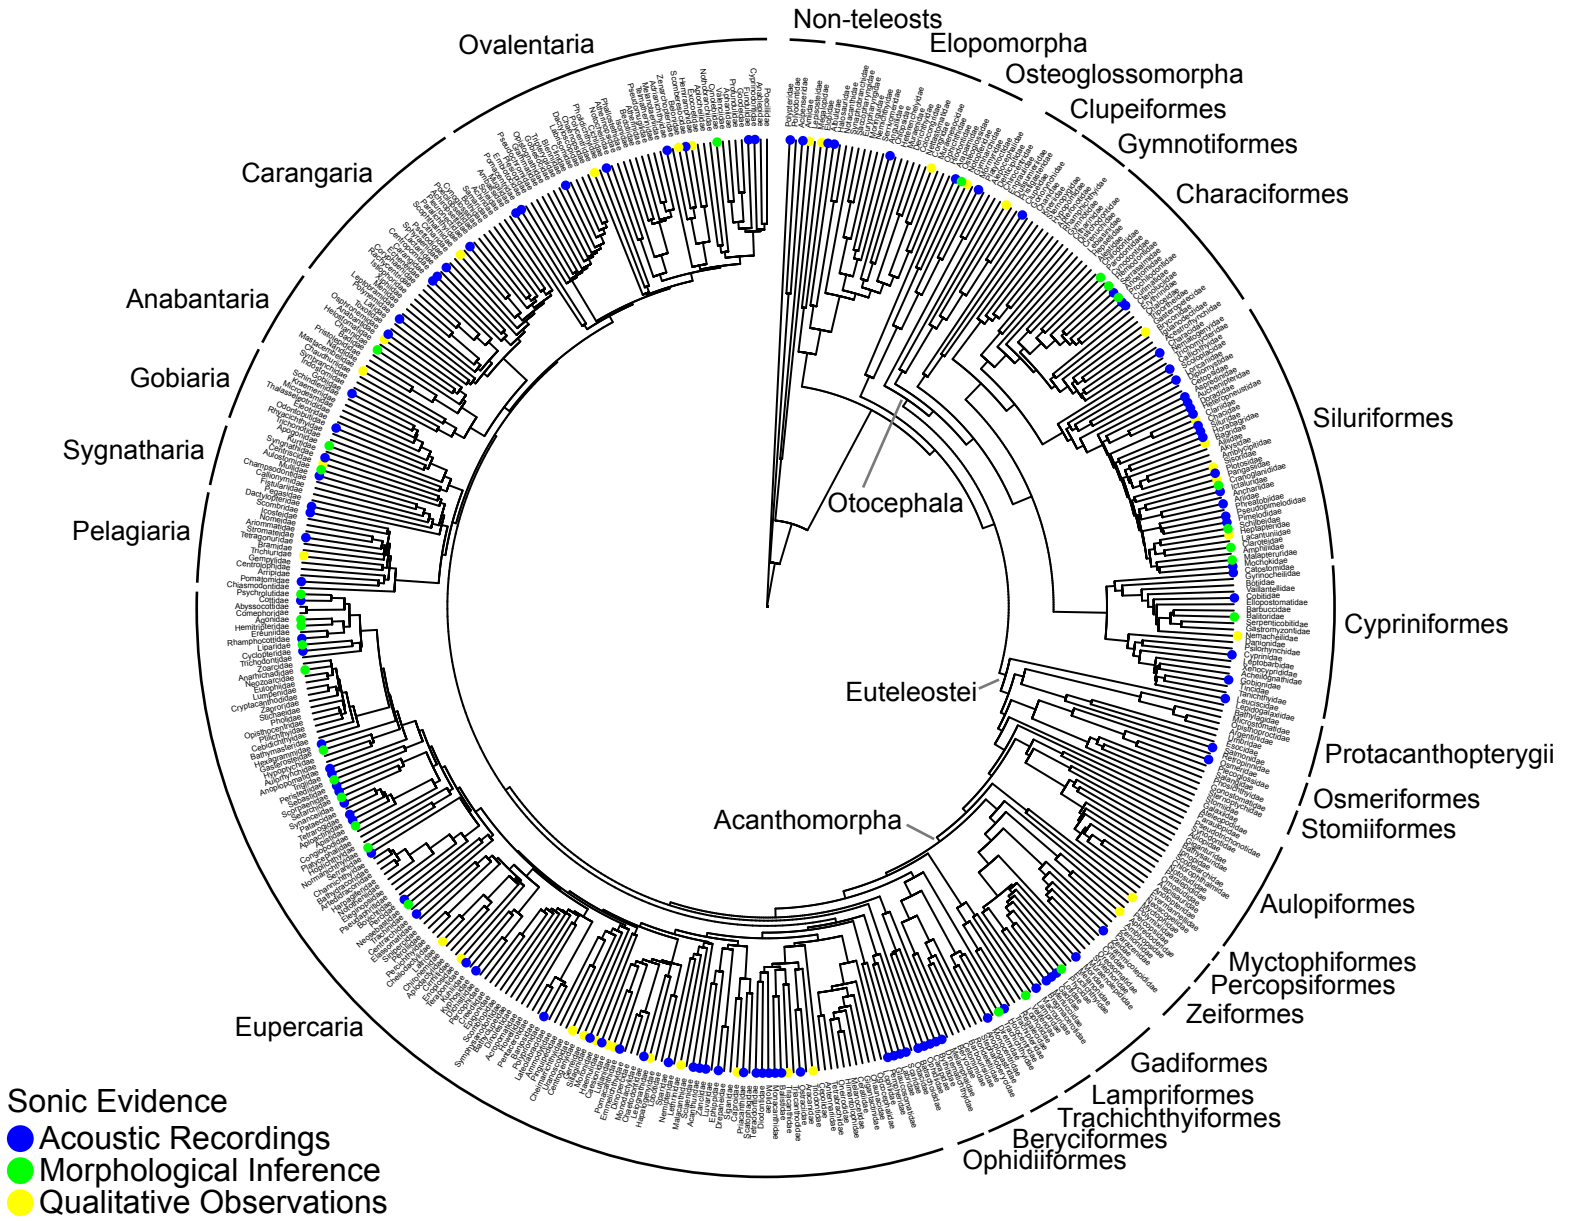



# Supplementary Figure 2

bioRxiv preprint doi: <https://doi.org/10.1101/2020.09.14.296335>; this version posted September 14, 2020. The copyright holder for this preprint (which was not certified by peer review) is the author/funder, who has granted bioRxiv a license to display the preprint in perpetuity. It is made available under aCC-BY 4.0 International license.

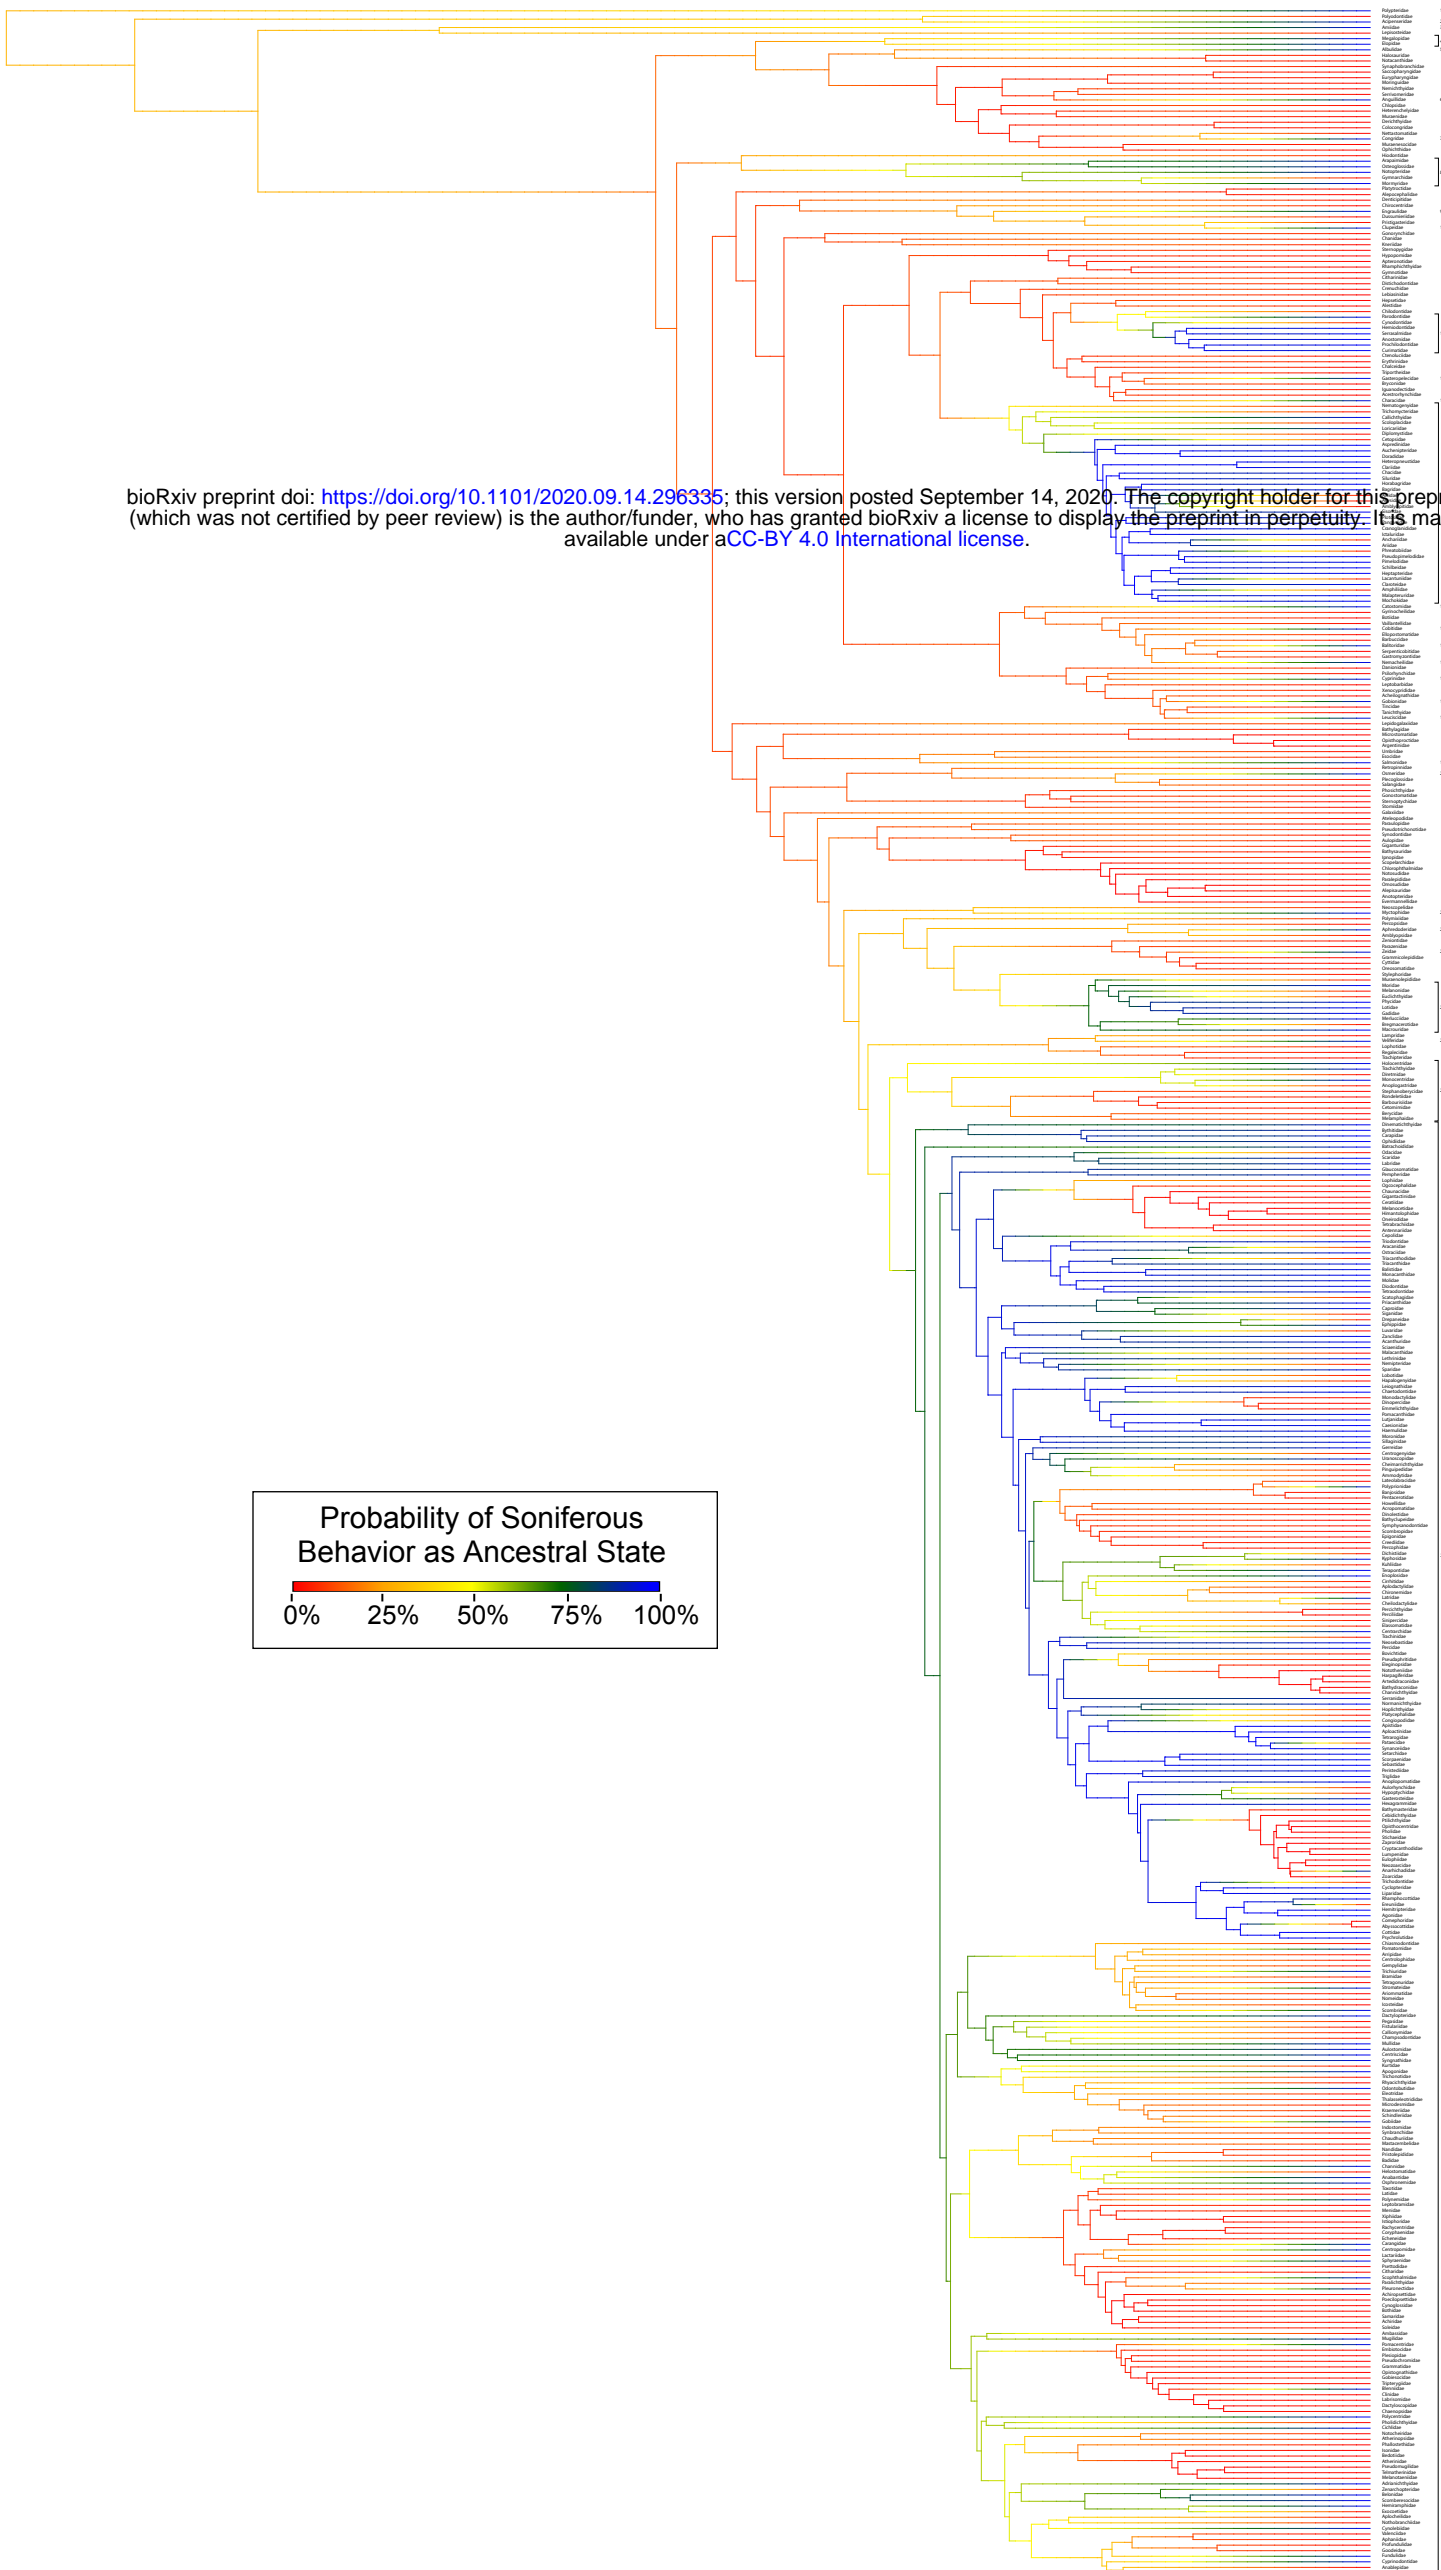

Supplementary Figure 3

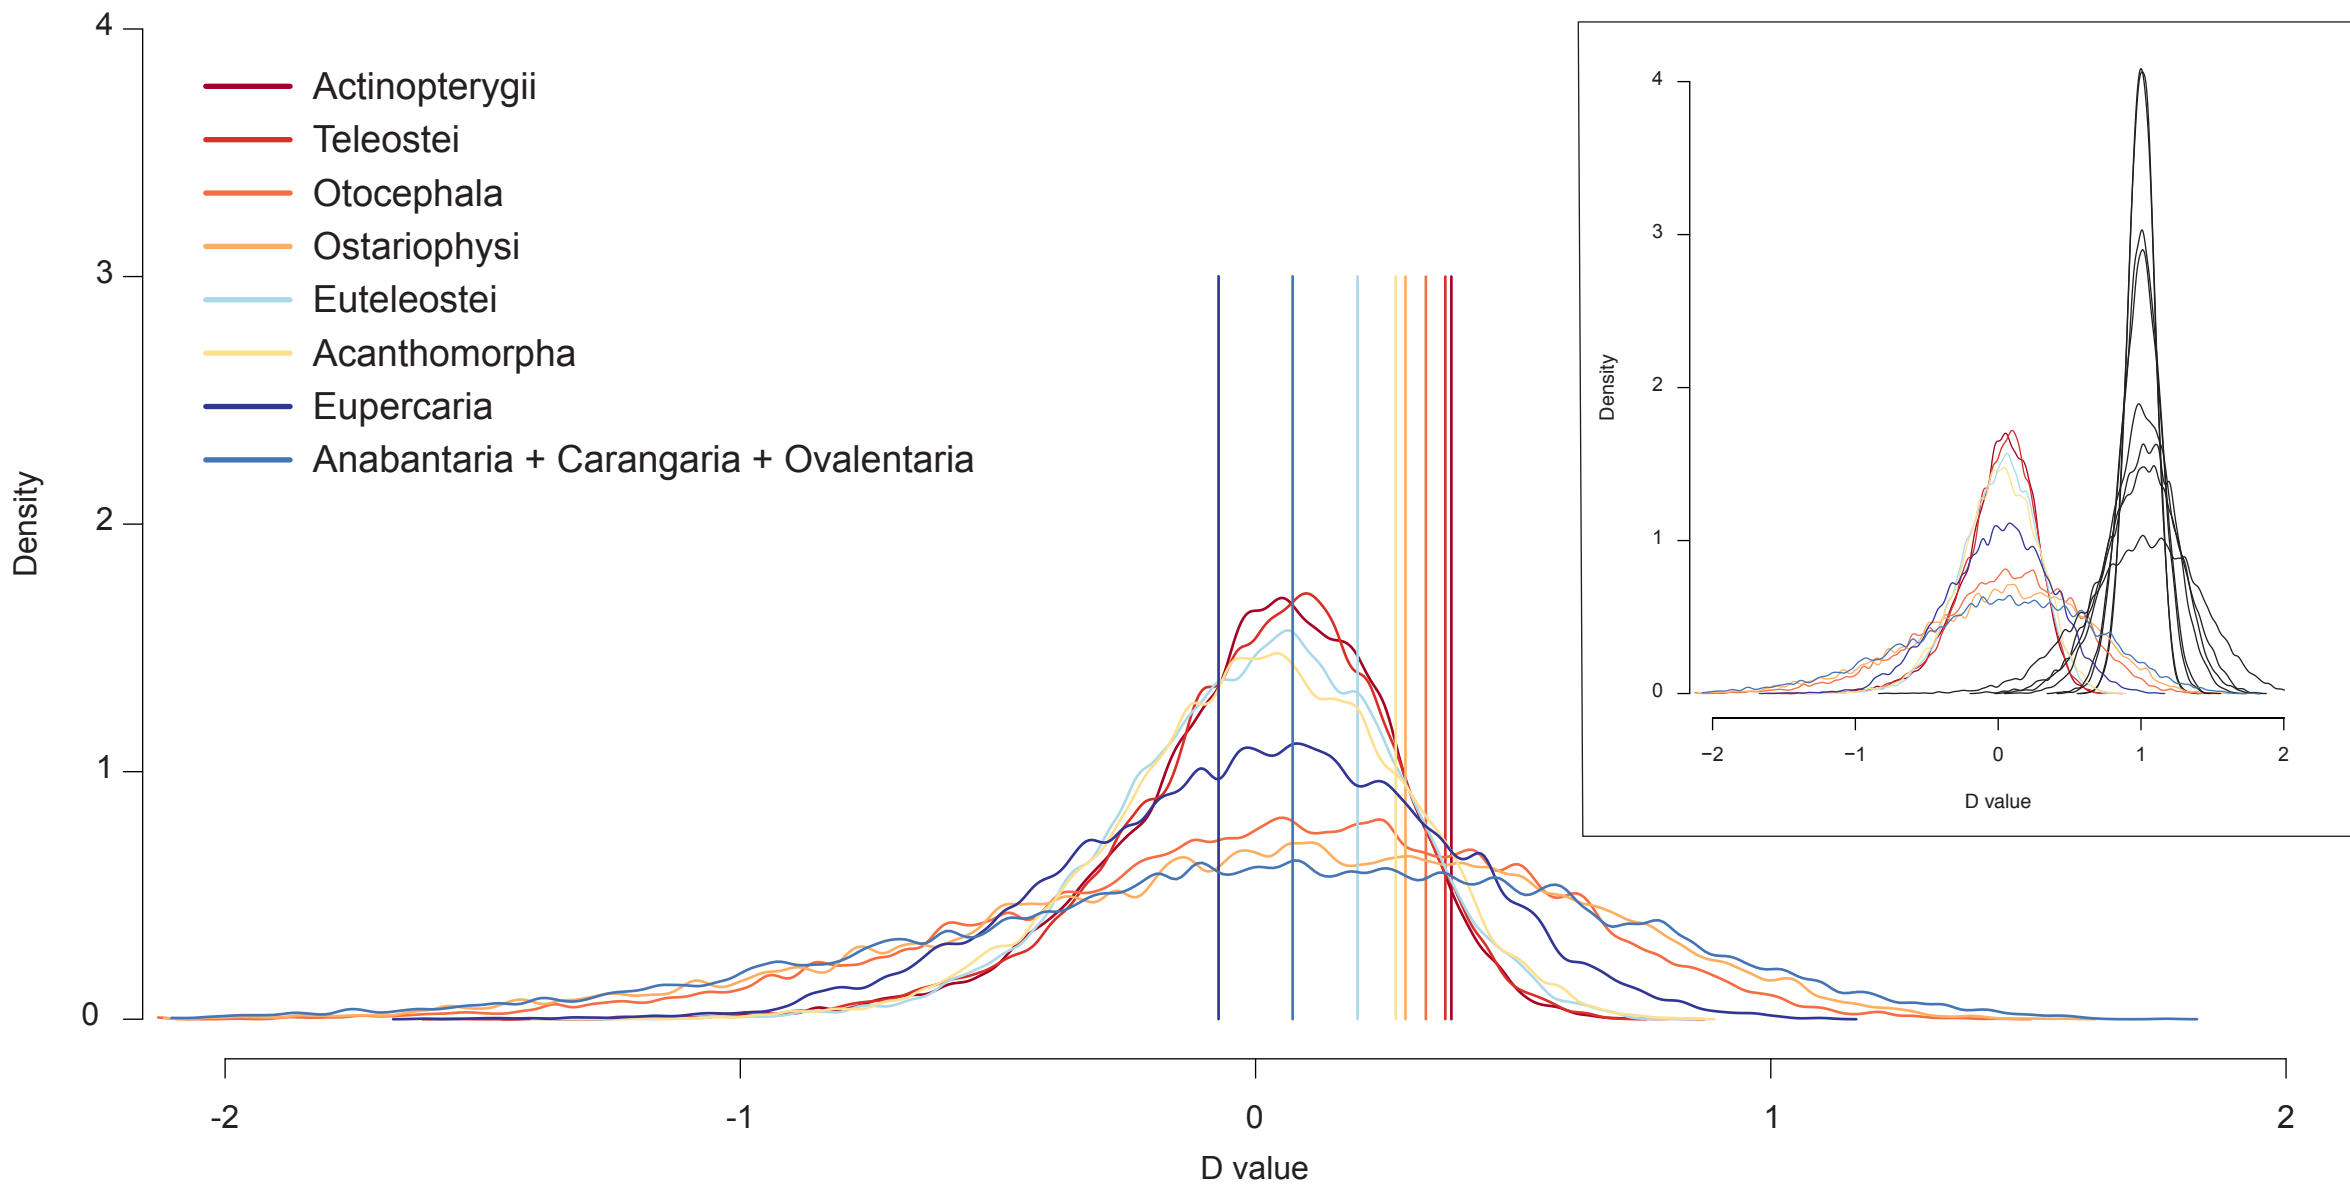

Source: https://www.biorxiv.org/content/10.1101/2020.09.14.296335v1.full.pdf
